# Supplementary material
Source: ML conference proceedings conference paper supplement (https://proceedings.neurips.cc/paper_files/paper/2019/hash/e465ae46b07058f4ab5e96b98f101756-Abstract.html)
Supplement: Supplementary file [file e465ae46b07058f4ab5e96b98f101756-Supplemental.zip]

## 287 A Proof of Theorem 1

288 The full proof for Theorem 1 is presented in this section. Since  $\alpha < \beta$ , we have  $p < n$  hold for large  
 289 enough  $N$ . Then, the least square estimate  $\hat{\theta}_P$  is given by  $(\mathbf{X}_P^\top \mathbf{X}_P)^{-1} \mathbf{X}_P^\top \mathbf{X} \boldsymbol{\theta}$  and the prediction  
 290 error is given by

$$\begin{aligned} \text{Error} &= \mathbb{E}_{\mathbf{x}, y}[(y - \mathbf{x}^\top \hat{\boldsymbol{\theta}})^2] = \mathbb{E}_{\mathbf{x}, y}[(\mathbf{x}_P^\top (\boldsymbol{\theta}_P - \hat{\boldsymbol{\theta}}_P) + \mathbf{x}_{P^c}^\top \boldsymbol{\theta}_{P^c})^2] \\ &= \|\boldsymbol{\Sigma}_P^{1/2} (\mathbf{X}_P^\top \mathbf{X}_P)^{-1} \mathbf{X}_P^\top \mathbf{X}_{P^c} \boldsymbol{\theta}_{P^c}\|^2 + \|\boldsymbol{\Sigma}_{P^c}^{1/2} \boldsymbol{\theta}_{P^c}\|^2, \end{aligned}$$

291 where  $\boldsymbol{\Sigma}_P \in \mathbb{R}^{p \times p}$  and  $\boldsymbol{\Sigma}_{P^c} \in \mathbb{R}^{(N-p) \times (N-p)}$  are the two diagonal matrices whose diagonal  
 292 elements are the first  $p$  and last  $N - p$  diagonal elements of  $\boldsymbol{\Sigma}$  respectively. By our assumption on  $\boldsymbol{\theta}$ ,  
 293 we have

$$\mathbb{E}_{\boldsymbol{\theta}}[\text{Error}] = \text{tr}(\mathbf{X}_{P^c}^\top \mathbf{X}_P (\mathbf{X}_P^\top \mathbf{X}_P)^{-1} \boldsymbol{\Sigma}_P (\mathbf{X}_P^\top \mathbf{X}_P)^{-1} \mathbf{X}_P^\top \mathbf{X}_{P^c}) + \text{tr}(\boldsymbol{\Sigma}_{P^c}).$$

294 Our next step is to apply Markov inequality to show (4). Note that  $\mathbf{X}_{P^c}$  is independent of  $\mathbf{X}_P$ .  
 295 Hence, the expectation of Error given  $\mathbf{X}_P$  is the following:

$$\begin{aligned} \mathbb{E}[\text{Error} | \mathbf{X}_P] &= \text{tr}(\boldsymbol{\Sigma}_{P^c}) \cdot (\text{tr}((\mathbf{X}_P^\top \mathbf{X}_P)^{-1} \boldsymbol{\Sigma}_P) + 1) \\ &= \text{tr}(\boldsymbol{\Sigma}_{P^c}) \cdot (\text{tr}((\bar{\mathbf{X}}_P^\top \bar{\mathbf{X}}_P)^{-1}) + 1), \end{aligned} \quad (26)$$

296 where  $\bar{\mathbf{X}}_P = \mathbf{X}_P \boldsymbol{\Sigma}_P^{-\frac{1}{2}}$ . (The expectation only conditions on  $\mathbf{X}_P$ ; in particular, it averages over  
 297  $\mathbf{X}_{P^c}$ .) Further, the variance of Error given  $\mathbf{X}_P$  is the following: letting  $\mathbf{z} \sim \mathcal{N}(\mathbf{0}, \mathbf{I})$ ,

$$\begin{aligned} \text{var}(\text{Error} | \mathbf{X}_P) &= \text{tr}(\boldsymbol{\Sigma}_{P^c}^2) \text{var}(\mathbf{z}^\top \mathbf{X}_P (\mathbf{X}_P^\top \mathbf{X}_P)^{-1} \boldsymbol{\Sigma}_P (\mathbf{X}_P^\top \mathbf{X}_P)^{-1} \mathbf{X}_P^\top \mathbf{z} | \mathbf{X}_P) \\ &\leq 2 \text{tr}(\boldsymbol{\Sigma}_{P^c}^2) \|\mathbf{X}_P (\mathbf{X}_P^\top \mathbf{X}_P)^{-1} \boldsymbol{\Sigma}_P (\mathbf{X}_P^\top \mathbf{X}_P)^{-1} \mathbf{X}_P^\top\|_F^2 \\ &= 2 \text{tr}(\boldsymbol{\Sigma}_{P^c}^2) \text{tr}((\mathbf{X}_P^\top \mathbf{X}_P)^{-1} \boldsymbol{\Sigma}_P (\mathbf{X}_P^\top \mathbf{X}_P)^{-1} \boldsymbol{\Sigma}_P) \\ &= 2 \text{tr}(\boldsymbol{\Sigma}_{P^c}^2) \text{tr}((\bar{\mathbf{X}}_P^\top \bar{\mathbf{X}}_P)^{-2}). \end{aligned}$$

298 Hence, by Markov's inequality and the fact that  $\text{tr}(\boldsymbol{\Sigma}_{P^c}^2) \leq \text{tr}(\boldsymbol{\Sigma}_{P^c})^2$ , we have

$$\mathbb{E}_{\boldsymbol{\theta}}[\text{Error}] = \mathbb{E}[\text{Error} | \mathbf{X}_P] \cdot \left( 1 + O_p \left( \text{tr}((\bar{\mathbf{X}}_P^\top \bar{\mathbf{X}}_P)^{-2})^{1/2} \cdot \left( \text{tr}((\bar{\mathbf{X}}_P^\top \bar{\mathbf{X}}_P)^{-1}) + 1 \right)^{-1} \right) \right). \quad (27)$$

299 Our next step is to simplify (27). Note that  $\bar{\mathbf{X}}_P$  is a standard Gaussian matrix. Hence, when  $\alpha > 0$ ,  
 300 from (2.104) and (2.105) of [18], we know

$$\frac{n}{p} \text{tr} \left( (\bar{\mathbf{X}}_P^\top \bar{\mathbf{X}}_P)^{-1} \right) \xrightarrow{\text{a.s.}} \frac{\beta}{\beta - \alpha} \quad \text{and} \quad \frac{n^2}{p} \cdot \text{tr} \left( (\bar{\mathbf{X}}_P^\top \bar{\mathbf{X}}_P)^{-2} \right) \xrightarrow{\text{a.s.}} \frac{\beta^3}{(\beta - \alpha)^3}.$$

301 When  $\alpha = 0$ , i.e.,  $p = o(n)$ , from (2.110) and (2.111) of [18], we know

$$\frac{n}{p} \text{tr} \left( (\bar{\mathbf{X}}_P^\top \bar{\mathbf{X}}_P)^{-1} \right) \xrightarrow{\text{a.s.}} 1 \quad \text{and} \quad \frac{n^2}{p} \text{tr} \left( (\bar{\mathbf{X}}_P^\top \bar{\mathbf{X}}_P)^{-2} \right) \xrightarrow{\text{a.s.}} 1.$$

302 Therefore, with (26) and (27), we have for all  $\alpha < \beta$ ,

$$\begin{aligned} \mathbb{E}_{\boldsymbol{\theta}}[\text{Error}] &= \mathbb{E}[\text{Error} | \mathbf{X}_P] \cdot \left( 1 + O_p \left( \sqrt{\frac{\beta \alpha (\beta - \alpha)^{-3}}{N \left( \frac{\alpha}{\beta - \alpha} + 1 \right)^2}} \right) \right) \\ &= \mathbb{E}[\text{Error} | \mathbf{X}_P] \cdot \left( 1 + O_p \left( \frac{1}{\sqrt{N}} \right) \right) \\ &\xrightarrow{p} \text{tr}(\boldsymbol{\Sigma}_{P^c}) \cdot \left( \text{tr} \left( (\bar{\mathbf{X}}_P^\top \bar{\mathbf{X}}_P)^{-1} \right) + 1 \right) \xrightarrow{p} \text{tr}(\boldsymbol{\Sigma}_{P^c}) \cdot \frac{\beta}{\beta - \alpha}. \end{aligned} \quad (28)$$

303 Our final step is to analyze  $\text{tr}(\boldsymbol{\Sigma}_{P^c})$ . Note that  $\int_s^{s+1} t^{-\kappa} dt < \frac{1}{s^\kappa} < \int_{s-1}^s t^{-\kappa} dt$ . Hence, we have

$$\int_{p+1}^N \frac{N^\kappa}{t^\kappa} dt / N < \frac{N^\kappa}{N} \sum_{i=p+1}^N \frac{1}{i^\kappa} = N^{\kappa-1} \text{tr}(\boldsymbol{\Sigma}_{P^c}) < \int_p^N \frac{N^\kappa}{t^\kappa} dt / N. \quad (29)$$

304 Therefore, we know  $\text{tr}(\boldsymbol{\Sigma}_{P^c}) \rightarrow N^{1-\kappa} \int_\alpha^1 t^{-\kappa} dt$  as  $p \rightarrow \infty$  and thus (4) holds.

## B Proof of Theorem 2

### B.1 Existence and positivity of $m'_\kappa(0)$

We already showed in Section 2.3 that  $m_\kappa(0)$  is well-defined. We now show that  $m_\kappa(z)$  is well-defined in a neighborhood of  $z = 0$ , which we can then use to establish the existence and positivity of  $m'_\kappa(0)$ . Note that, in fact, Lemma 1 in Appendix B.2 shows that  $m_\kappa(z)$  is the Stieltjes transform of a distribution, specifically the limiting distribution of the empirical eigenvalue distribution of  $\Sigma_P$ . This lemma, which is proved in Appendix B.4, establishes the existence of the Stieltjes transform for all  $z \leq 0$ . Here, we just give the arguments needed to show the existence of  $m'_\kappa(0)$ .

Define

$$z_\kappa(m) := -\frac{1}{m} + \frac{1}{\beta} \int_{\alpha-\kappa}^{\infty} \frac{1}{\kappa t^{1/\kappa}(1+t \cdot m)} dt.$$

Based on (6), we can consider  $z_\kappa(m)$  to be the inverse of  $m_\kappa(z)$  wherever  $m_\kappa(z)$  exists. Then, note that

$$\frac{dz_\kappa(m)}{dm} = \frac{1}{m^2} - \frac{1}{\beta} \int_{\alpha-\kappa}^{\infty} \frac{t^2}{\kappa t^{1+1/\kappa}(1+t \cdot m)^2} dt.$$

Hence, we have

$$\frac{dz_\kappa(m)}{dm} \geq 0 \Leftrightarrow 1 \geq \frac{1}{\beta} \int_{\alpha-\kappa}^{\infty} \frac{t^2}{\kappa t^{1+1/\kappa}(m^{-1}+t)^2} dt.$$

Note that  $\frac{1}{\beta} \int_{\alpha-\kappa}^{\infty} \frac{t^2}{\kappa t^{1+1/\kappa}(m^{-1}+t)^2} dt$  is an increasing function of  $m$  with

$$\begin{aligned} \frac{1}{\beta} \int_{\alpha-\kappa}^{\infty} \frac{t^2}{\kappa t^{1+1/\kappa}(m^{-1}+t)^2} dt &\rightarrow 0 \quad \text{as } m \rightarrow 0; \\ \frac{1}{\beta} \int_{\alpha-\kappa}^{\infty} \frac{t^2}{\kappa t^{1+1/\kappa}(m^{-1}+t)^2} dt &\rightarrow \frac{1}{\beta} > 1 \quad \text{as } m \rightarrow \infty. \end{aligned}$$

Hence, there exists a constant  $m_c$  such that for all  $0 < m < m_c$ , the function  $z_\kappa(m)$  is increasing on the interval  $(0, m_c)$  and decreasing on  $(m_c, \infty)$ . Furthermore, note that

$$m \cdot z_\kappa(m) = \frac{1}{\beta} \int_{\alpha-\kappa}^{\infty} \frac{1}{\kappa t^{1/\kappa}(m^{-1}+t)} dt - 1. \quad (30)$$

Evaluating this integral as  $m \rightarrow 0^+$  and as  $m \rightarrow +\infty$  shows that

$$m \cdot z_\kappa(m) \rightarrow \begin{cases} -1 & \text{as } m \rightarrow 0^+, \\ \frac{1}{\beta} - 1 > 0 & \text{as } m \rightarrow +\infty, \end{cases} \quad (31)$$

which in turn implies

$$z_\kappa(m) \rightarrow \begin{cases} -\infty & \text{as } m \rightarrow 0^+, \\ 0 & \text{as } m \rightarrow +\infty. \end{cases} \quad (32)$$

Therefore,  $z_\kappa(m)$  is strictly increasing on  $z \leq 0$ . Further, for  $z \in [0, z_\kappa(m_c)]$ , there are two only solutions of  $m$  satisfying (6). Therefore, since  $m_\kappa(z)$  is defined to be the smallest positive solution of (6), the mapping between  $z \in (-\infty, z_\kappa(m_c)]$  and  $m \in (0, m_c]$  defined by  $z_\kappa(m)$  and  $m_\kappa(z)$  is continuous, one-to-one, and  $z_\kappa(m_c) > 0$ . This shows that  $m_\kappa(z)$  is well-defined and continuous at  $z = 0$ . Then, by continuity of the defining expression, we conclude that  $m'_\kappa(0)$  exists.

Next, we use the chain rule to calculate the value of  $m'_\kappa(0)$ . From the definition of  $m_\kappa$  in (6), the change-of-variable in (12), and the definition of  $q_\kappa$  in (13), we have

$$-z = \frac{1}{\beta \alpha \cdot m_\kappa(z)^{1-1/\kappa}} \cdot q_\kappa \left( \frac{m_\kappa(z)^{1/\kappa}}{\alpha}, \alpha \right) \quad (33)$$

for  $z$  in a neighborhood of  $z = 0$ . Also, from the analysis in Section 2.3, we have  $m_\kappa(0) = (s_\kappa^* \alpha)^\kappa$  and  $q_\kappa(s_\kappa^*, \alpha) = 0$ . Then, taking the derivative with respect to  $z$  on both sides of (33) and with the chain rule, we have

$$\begin{aligned} -1 &= \left( \frac{1}{\kappa} - 1 \right) \cdot \frac{m_\kappa(z)^{1/\kappa-2}}{\beta\alpha} \cdot q_\kappa \left( \frac{m_\kappa(z)^{1/\kappa}}{\alpha}, \alpha \right) \\ &\quad + \frac{1}{\beta\alpha m_\kappa(z)^{1-1/\kappa}} \cdot \frac{\partial q_\kappa(s, \alpha)}{\partial s} \Big|_{s=m_\kappa(z)^{1/\kappa}} \cdot \frac{m_\kappa(z)^{1/\kappa-1}}{\kappa\alpha} \cdot m'_\kappa(z). \end{aligned}$$

Hence, plugging in  $z = 0$  and solving for  $m'_\kappa(0)$  gives

$$m'_\kappa(0) = \frac{\kappa\beta\alpha^2(m_\kappa(0))^{2-2/\kappa}}{-\frac{\partial q_\kappa(s, \alpha)}{\partial s} \Big|_{s=s_\kappa^*}}.$$

Then, using the formula for the derivative of  $q_\kappa$  in (14), we have

$$m'_\kappa(0) = \kappa\beta m_\kappa^2(0) \cdot \frac{1 + (s_\kappa^*)^\kappa}{\beta - (\alpha - \beta)(s_\kappa^*)^\kappa}. \quad (34)$$

Since  $(s_\kappa^*)^\kappa < \beta/(\alpha - \beta)$  (recall the argument in Section 2.3 following Equation (14)), it follows that  $m'_\kappa(0) > 0$ .

## B.2 Analysis of part 1

In this section, we will prove that

$$\text{tr} \left( \Sigma_P (\mathbf{I} - \Pi_{\mathbf{X}_P}) \right) \xrightarrow{\text{P}} \frac{N^{1-\kappa}\beta}{m_\kappa(0)}. \quad (35)$$

(The existence and uniqueness of  $m_\kappa^* := m_\kappa(0)$  is proved in the beginning of Section 2.3.) Let  $\tilde{\Sigma}_P = N^\kappa \Sigma_P$  and  $\tilde{\mathbf{X}}_P = N^{\kappa/2} \mathbf{X}_P$ , then we have, for all  $\mu > 0$ ,

$$\begin{aligned} \text{tr} \left( \Sigma_P (\mathbf{I} - \Pi_{\mathbf{X}_P}) \right) &= \frac{n}{N^\kappa} \left( \frac{1}{n} \text{tr} \left( \tilde{\Sigma}_P \right) - \frac{1}{n} \text{tr} \left( \tilde{\Sigma}_P \tilde{\mathbf{X}}_P^\top \left( \tilde{\mathbf{X}}_P \tilde{\mathbf{X}}_P^\top \right)^{-1} \tilde{\mathbf{X}}_P \right) \right) \\ &= \frac{n}{N^\kappa} \left( \frac{1}{n} \text{tr} \left( \tilde{\Sigma}_P \right) - \frac{1}{n} \text{tr} \left( \tilde{\Sigma}_P \left( \tilde{\mathbf{X}}_P^\top \tilde{\mathbf{X}}_P + \mu n \mathbf{I} \right)^{-1} \tilde{\mathbf{X}}_P^\top \tilde{\mathbf{X}}_P \right) + \epsilon_{\mu_n} \right) \\ &= \frac{n}{N^\kappa} \left( \mu \cdot \frac{1}{n} \text{tr} \left( \tilde{\Sigma}_P \left( \frac{1}{n} \tilde{\mathbf{X}}_P^\top \tilde{\mathbf{X}}_P + \mu \mathbf{I} \right)^{-1} \right) + \epsilon_{\mu_n} \right), \end{aligned} \quad (36)$$

where  $\epsilon_{\mu_n}$  is given by

$$\epsilon_{\mu_n} := \frac{1}{n} \text{tr} \left( \tilde{\Sigma}_P \left( \tilde{\mathbf{X}}_P^\top \tilde{\mathbf{X}}_P + n\mu \mathbf{I} \right)^{-1} \tilde{\mathbf{X}}_P^\top \tilde{\mathbf{X}}_P \right) - \frac{1}{n} \text{tr} \left( \tilde{\Sigma}_P \tilde{\mathbf{X}}_P^\top \left( \tilde{\mathbf{X}}_P \tilde{\mathbf{X}}_P^\top \right)^{-1} \tilde{\mathbf{X}}_P \right).$$

Since  $n/N^\kappa \rightarrow N^{1-\kappa}\beta$ , the claim in (35) is implied by

$$\mu \cdot \frac{1}{n} \text{tr} \left( \tilde{\Sigma}_P \left( \frac{1}{n} \tilde{\mathbf{X}}_P^\top \tilde{\mathbf{X}}_P + \mu \mathbf{I} \right)^{-1} \right) + \epsilon_{\mu_n} = \frac{1}{m_\kappa(0)} + o_{\text{P}}(1).$$

Hence, our task is reduced to finding a suitable positive sequence  $(\mu_n)_{n \geq 1}$  such that the following hold:

$$|\epsilon_{\mu_n}| = o_{\text{P}}(1), \quad (37)$$

and

$$\mu_n \cdot \frac{1}{n} \text{tr} \left( \tilde{\Sigma}_P \left( \frac{1}{n} \tilde{\mathbf{X}}_P^\top \tilde{\mathbf{X}}_P + \mu_n \mathbf{I} \right)^{-1} \right) \xrightarrow{\text{P}} \frac{1}{m_\kappa(0)}. \quad (38)$$

With foresight, we shall assume that

$$\mu_n < \min \left\{ \frac{1}{\sqrt{N}}, o(N^{-\kappa}) \right\}.$$

### 346 B.2.1 Proof of Equation (37)

347 Let us first show (37). Towards this end, we bound  $|\epsilon_{\mu_n}|$  as follows:

$$\begin{aligned}
|\epsilon_{\mu_n}| &= \frac{1}{n} \left| \text{tr} \left( \tilde{\Sigma}_P \left( \left( \tilde{\mathbf{X}}_P^\top \tilde{\mathbf{X}}_P + \mu_n n \mathbf{I} \right)^{-1} \tilde{\mathbf{X}}_P^\top \tilde{\mathbf{X}}_P - \tilde{\mathbf{X}}_P^\top \left( \tilde{\mathbf{X}}_P \tilde{\mathbf{X}}_P^\top \right)^{-1} \tilde{\mathbf{X}}_P \right) \right) \right| \\
&\stackrel{(i)}{\leq} \frac{1}{n} \|\tilde{\Sigma}_P\|_2 \text{tr} \left( \tilde{\mathbf{X}}_P^\top \left( \tilde{\mathbf{X}}_P \tilde{\mathbf{X}}_P^\top \right)^{-1} \tilde{\mathbf{X}}_P - \left( \tilde{\mathbf{X}}_P^\top \tilde{\mathbf{X}}_P + \mu_n n \mathbf{I} \right)^{-1} \tilde{\mathbf{X}}_P^\top \tilde{\mathbf{X}}_P \right) \\
&\leq \frac{N^\kappa}{n} \cdot \sum_{i=1}^n \frac{\mu_n}{\tilde{\lambda}_i + \mu_n} = N^\kappa \cdot \mu_n \cdot m_n(-\mu_n) \leq N^\kappa \cdot \frac{\mu_n}{\min_i(\tilde{\lambda}_i)}, \tag{39}
\end{aligned}$$

348 where  $\tilde{\lambda}_i$  is the  $i$ -th eigenvalue of  $\frac{1}{n} \tilde{\mathbf{X}}_P \tilde{\mathbf{X}}_P^\top$  and  $m_n(z)$  is the Stieltjes transform of the empirical  
349 eigenvalue distribution of  $\frac{1}{n} \tilde{\mathbf{X}} \tilde{\mathbf{X}}^\top$ . Inequality (i) holds because

$$\tilde{\mathbf{X}}_P^\top \left( \tilde{\mathbf{X}}_P \tilde{\mathbf{X}}_P^\top \right)^{-1} \tilde{\mathbf{X}}_P - \left( \tilde{\mathbf{X}}_P^\top \tilde{\mathbf{X}}_P + \mu_n n \mathbf{I} \right)^{-1} \tilde{\mathbf{X}}_P^\top \tilde{\mathbf{X}}_P$$

350 is positive semi-definite. Hence, the proof of (37) only require us to lower bound  $\min_i(\tilde{\lambda}_i)$  and the  
351 following lemma will help us complete this task.

352 **Lemma 1.** Suppose the empirical eigenvalue distribution of the diagonal matrix  $\mathbf{H}$  converges to  
353 a limiting distribution  $\mathcal{H}$  with probability density function  $f_h$ . Assume that the support of  $f_h$  is a  
354 subset of the interval  $[\eta_1, \infty)$  for some positive constant  $\eta_1$ . Let  $\tilde{\mathbf{X}} \in \mathbb{R}^{n \times p}$  be a standard Gaussian  
355 matrix and suppose  $p/n \rightarrow \gamma > 1$ . Let  $m_n(z)$  be the Stieltjes transform of the empirical eigenvalue  
356 distribution  $\mathcal{F}_n$  of  $\frac{1}{n} \tilde{\mathbf{X}} \mathbf{H} \tilde{\mathbf{X}}^\top$ . Then  $\mathcal{F}_n$  converges to a limit  $\mathcal{F}$  whose Stieltjes transform, denoted by  
357  $m(z)$ , satisfies

$$m(z) = - \left( z - \gamma \int_{\eta_1}^{\infty} \frac{t f_h(t) dt}{1 + t \cdot m(z)} \right)^{-1}, \quad \forall z \in \text{supp}(\mathcal{F})^c. \tag{40}$$

358 Further, there exists a constant  $c_\epsilon > 0$  such that the minimum eigenvalue of  $\frac{1}{n} \tilde{\mathbf{X}} \mathbf{H} \tilde{\mathbf{X}}^\top$  is lower-  
359 bounded by  $c_\epsilon$  in probability. Finally, for any increasing sequence  $z_n \rightarrow 0^-$ , we have

$$m_n(z_n) \xrightarrow{P} m(0) \quad \text{and} \quad m'_n(z_n) \xrightarrow{P} m'(0). \tag{41}$$

360 The proof of Lemma 1 is shown in Appendix B.4. Hence to apply Lemma 1, we need the empirical  
361 distribution of the eigenvalues of the covariance matrix  $\Sigma_P$  converges to a limiting distribution and  
362 thus we need to scale  $\Sigma_P$  properly. The following lemma confirms that the correct scaling is  $p^\kappa$ .

363 **Lemma 2.** Let  $S = \{i\}_{p_1 \leq i \leq p_2}$  with  $0 \leq p_1 < p_2 \leq N$ . Suppose  $\frac{p_1}{N} \rightarrow \alpha_1$  and  $\frac{p_2}{N} \rightarrow \alpha_2$   
364 with  $0 \leq \alpha_1 < \alpha_2 \leq 1$ . Then, the empirical eigenvalue distribution of  $N^\kappa \Sigma_S$  converges to a  
365 (non-random) distribution  $\mathcal{F}$  with probability density function  $f$  given by

$$f(s) = \begin{cases} \frac{1}{\kappa(\alpha_2 - \alpha_1)} s^{-1-\frac{1}{\kappa}} \cdot \mathbb{1}_{\{s \in [\alpha_2^{-\kappa}, \alpha_1^{-\kappa}]\}}, & \alpha_1 > 0 \\ \frac{1}{\kappa \alpha_2} s^{-1-\frac{1}{\kappa}} \cdot \mathbb{1}_{\{s \in [\alpha_2^{-\kappa}, \infty)\}}, & \alpha_1 = 0 \end{cases}. \tag{42}$$

366 The proof of Lemma 2 is shown in Appendix B.5. Using Lemma 1, Lemma 2, and (39), we see that  
367 since  $\mu_n = o(N^{-\kappa})$ , we have

$$|\epsilon_{\mu_n}| = o_p(1),$$

368 which establishes Equation (37).

### 369 B.2.2 Proof of Equation (38)

370 Our next goal is to prove (38), i.e.,

$$\frac{\mu_n}{n} \text{tr}(\tilde{\Sigma}_P \tilde{\mathbf{S}}_n) \xrightarrow{P} \frac{1}{m_\kappa(0)}$$

371 where

$$\tilde{\mathbf{S}}_n := \left( \frac{1}{n} \tilde{\mathbf{X}}_P^\top \tilde{\mathbf{X}}_P + \mu_n \mathbf{I} \right)^{-1}.$$

372 The same result has been proved in Lemma 2.2 of [11] with additional assumption that the empirical  
 373 eigenvalue distribution of  $\tilde{\mathbf{S}}$  converges to a limiting distribution with bounded support. However,  
 374 this assumption does not hold in our case. We employ a similar proof strategy with more involved  
 375 arguments based on leave-one-out estimates [19].

376 Let  $\tilde{\mathbf{x}}_i$  be the  $i$ -th row of  $\tilde{\mathbf{X}}_P$ . Then using the identity

$$\tilde{\mathbf{S}}_n^{-1} - \mu_n \mathbf{I} = \frac{1}{n} \sum_{i=1}^n \tilde{\mathbf{x}}_i \tilde{\mathbf{x}}_i^\top,$$

377 we have

$$\begin{aligned} \frac{1}{n} \sum_{i=1}^n \tilde{\mathbf{x}}_i^\top \tilde{\mathbf{S}}_n \tilde{\mathbf{x}}_i &= \frac{1}{n} \operatorname{tr} \left( \sum_{i=1}^n \tilde{\mathbf{S}}_n \tilde{\mathbf{x}}_i \tilde{\mathbf{x}}_i^\top \right) \\ &= \operatorname{tr} \left( \tilde{\mathbf{S}}_n (\tilde{\mathbf{S}}_n^{-1} - \mu_n \mathbf{I}) \right) \\ &= \operatorname{tr} \left( \mathbf{I} - \mu_n \tilde{\mathbf{S}}_n \right). \end{aligned} \quad (43)$$

378 For each  $i = 1, \dots, n$ , define

$$\tilde{\mathbf{S}}_n^{\setminus i} := \left( \frac{1}{n} \tilde{\mathbf{X}}_P^\top \tilde{\mathbf{X}}_P - \frac{1}{n} \tilde{\mathbf{x}}_i \tilde{\mathbf{x}}_i^\top + \mu_n \mathbf{I} \right)^{-1} = \left( \tilde{\mathbf{S}}_n^{-1} - n^{-1} \tilde{\mathbf{x}}_i \tilde{\mathbf{x}}_i^\top \right)^{-1}.$$

379 By the Sherman-Morrison formula, we have

$$\tilde{\mathbf{S}}_n = \tilde{\mathbf{S}}_n^{\setminus i} - \frac{1}{n} \cdot \frac{\tilde{\mathbf{S}}_n^{\setminus i} \tilde{\mathbf{x}}_i \tilde{\mathbf{x}}_i^\top \tilde{\mathbf{S}}_n^{\setminus i}}{1 + \frac{1}{n} \tilde{\mathbf{x}}_i^\top \tilde{\mathbf{S}}_n^{\setminus i} \tilde{\mathbf{x}}_i}. \quad (44)$$

380 Hence, with (43), we have

$$\begin{aligned} \operatorname{tr}(\mathbf{I} - \mu_n \tilde{\mathbf{S}}_n) &= \frac{1}{n} \sum_{i=1}^n \tilde{\mathbf{x}}_i^\top \tilde{\mathbf{S}}_n \tilde{\mathbf{x}}_i = \frac{1}{n} \sum_{i=1}^n \tilde{\mathbf{x}}_i^\top \left( \tilde{\mathbf{S}}_n^{\setminus i} - \frac{1}{n} \cdot \frac{\tilde{\mathbf{S}}_n^{\setminus i} \tilde{\mathbf{x}}_i \tilde{\mathbf{x}}_i^\top \tilde{\mathbf{S}}_n^{\setminus i}}{1 + \frac{1}{n} \tilde{\mathbf{x}}_i^\top \tilde{\mathbf{S}}_n^{\setminus i} \tilde{\mathbf{x}}_i} \right) \tilde{\mathbf{x}}_i \\ &= \frac{1}{n} \sum_{i=1}^n \frac{\tilde{\mathbf{x}}_i^\top \tilde{\mathbf{S}}_n^{\setminus i} \tilde{\mathbf{x}}_i}{1 + \frac{1}{n} \tilde{\mathbf{x}}_i^\top \tilde{\mathbf{S}}_n^{\setminus i} \tilde{\mathbf{x}}_i} = n - \sum_{i=1}^n \frac{1}{1 + \frac{1}{n} \tilde{\mathbf{x}}_i^\top \tilde{\mathbf{S}}_n^{\setminus i} \tilde{\mathbf{x}}_i}. \end{aligned}$$

381 Since  $\operatorname{tr}(\mathbf{I} - \mu_n \tilde{\mathbf{S}}_n) = n - n\mu_n \cdot m_n(-\mu_n)$ , we have

$$m_n(-\mu_n) = \frac{1}{n} \sum_{i=1}^n \frac{1}{\mu_n + \frac{\mu_n}{n} \tilde{\mathbf{x}}_i^\top \tilde{\mathbf{S}}_n^{\setminus i} \tilde{\mathbf{x}}_i}. \quad (45)$$

382 Note that  $|m_n(-\mu_n) - m_n(0)| \leq \frac{\mu_n}{\min(\tilde{\lambda}_i^2)}$  where  $\tilde{\lambda}_i$  is the  $i$ th eigenvalue of  $\frac{1}{n} \tilde{\mathbf{X}}_P \tilde{\mathbf{X}}_P^\top$ . By Lemma 1,  
 383 we have

$$m_n(-\mu_n) = m_n(0) + O_p(\mu_n) \xrightarrow{P} m_\kappa(0). \quad (46)$$

384 Therefore, the LHS of (45) converges to  $m_\kappa(0)$  in probability. Then we just need to show the RHS of  
 385 (45) converges to

$$\left( \frac{\mu_n}{n} \operatorname{tr}(\tilde{\mathbf{\Sigma}}_P \tilde{\mathbf{S}}_n) \right)^{-1}$$

386 in probability. Let

$$\Delta_i := \frac{\mu_n}{n} \operatorname{tr}(\tilde{\mathbf{\Sigma}}_P \tilde{\mathbf{S}}_n) - \frac{\mu_n}{n} \tilde{\mathbf{x}}_i^\top \tilde{\mathbf{S}}_n^{\setminus i} \tilde{\mathbf{x}}_i - \mu_n,$$

387 then note that

$$\begin{aligned}
\left| \left( \frac{\mu_n}{n} \text{tr} \left( \tilde{\Sigma}_P \tilde{\mathbf{S}}_n \right) \right)^{-1} - m_n(-\mu_n) \right| &= \left| \left( \frac{\mu_n}{n} \text{tr} \left( \tilde{\Sigma}_P \tilde{\mathbf{S}}_n \right) \right)^{-1} - \frac{1}{n} \sum_{i=1}^n \frac{1}{\mu_n + \frac{\mu_n}{n} \tilde{\mathbf{x}}_i^\top \tilde{\mathbf{S}}_n \tilde{\mathbf{x}}_i} \right| \\
&= \left| \frac{1}{n} \sum_{i=1}^n \frac{\Delta_i}{\frac{\mu_n}{n} \text{tr} \left( \tilde{\Sigma}_P \tilde{\mathbf{S}}_n \right) \cdot \left( \frac{\mu_n}{n} \text{tr} \left( \tilde{\Sigma}_P \tilde{\mathbf{S}}_n \right) - \Delta_i \right)} \right| \\
&\leq \sup_i \frac{|\Delta_i|}{\frac{\mu_n}{n} \text{tr} \left( \tilde{\Sigma}_P \tilde{\mathbf{S}}_n \right) \cdot \left| \frac{\mu_n}{n} \text{tr} \left( \tilde{\Sigma}_P \tilde{\mathbf{S}}_n \right) - |\Delta_i| \right|}.
\end{aligned}$$

388 We claim that

$$\begin{aligned}
\frac{\mu_n}{n} \text{tr} \left( \tilde{\Sigma}_P \tilde{\mathbf{S}}_n \right) &= \Theta_p(1); \\
\sup_i |\Delta_i| &= O_p \left( \frac{\ln N}{\sqrt{N}} \right)
\end{aligned}$$

389 (Proposition 1 and Proposition 2 below). Then with (46), we have

$$\left( \frac{\mu_n}{n} \text{tr} \left( \tilde{\Sigma}_P \tilde{\mathbf{S}}_n \right) \right)^{-1} \xrightarrow{P} m_\kappa(0).$$

390 This in turn implies Equation (38) as desired.

### 391 B.2.3 Supporting propositions

#### Proposition 1.

$$\frac{\mu_n}{n} \text{tr} \left( \tilde{\Sigma}_P \tilde{\mathbf{S}}_n \right) = \Theta_p(1).$$

392 *Proof.* Note that

$$\begin{aligned}
\frac{\mu_n}{n} \text{tr} \left( \tilde{\Sigma}_P \tilde{\mathbf{S}}_n \right) &\stackrel{(i)}{\geq} \frac{\mu_n}{n} \text{tr} \left( \tilde{\mathbf{S}}_n \right) = \frac{\mu_n}{n} \text{tr} \left( \left( \frac{1}{n} \tilde{\mathbf{X}}_P^\top \tilde{\mathbf{X}}_P + \mu_n \mathbf{I} \right)^{-1} \right) \\
&\stackrel{(ii)}{\geq} \frac{\mu_n}{n} \cdot \frac{p-n}{\mu_n} \rightarrow \frac{\alpha-\beta}{\beta} > 0,
\end{aligned}$$

393 where inequality (i) holds due to the fact that  $\tilde{\Sigma}_P$  is a diagonal matrix with diagonal elements lower

394 bounded by 1, and inequality (ii) holds due to the fact that  $\left( \frac{1}{n} \tilde{\mathbf{X}}_P^\top \tilde{\mathbf{X}}_P + \mu_n \mathbf{I} \right)^{-1}$  has at least  $p-n$

395 number of eigenvalues  $\frac{1}{\mu_n}$ . Hence, we have  $\frac{\mu_n}{n} \text{tr}(\tilde{\Sigma}_P \tilde{\mathbf{S}}_n) = \Omega_p(1)$ . To show  $\frac{\mu_n}{n} \text{tr}(\tilde{\Sigma}_P \tilde{\mathbf{S}}_n) =$

396  $O_p(1)$  as well, let us introduce  $\bar{\mathbf{S}}_n = \tilde{\Sigma}_P^{1/2} \tilde{\mathbf{S}}_n \tilde{\Sigma}_P^{1/2}$ , then we have

$$\frac{\mu_n}{n} \text{tr} \left( \tilde{\Sigma}_P \tilde{\mathbf{S}}_n \right) = \frac{\mu_n}{n} \text{tr} \left( \bar{\mathbf{S}}_n \right) \leq \mu_n \frac{p}{n} \|\bar{\mathbf{S}}_n\|_2.$$

397 Therefore, as  $p/n \rightarrow \alpha/\beta$ , we just need to upper bound  $\|\bar{\mathbf{S}}_n\|_2$ . To do this, we use the following

398 lemma.

399 **Lemma 3.** Let  $\Sigma \in \mathbb{R}^{p \times p}$  be a diagonal matrix. Let  $\bar{\mathbf{X}} \in \mathbb{R}^{n \times p}$  be a standard Gaussian matrix  
400 with  $p > n$ . Suppose  $\frac{p}{n} \rightarrow \gamma > 1$  as  $n, p \rightarrow \infty$ . Suppose the  $\frac{n}{2}$ th smallest diagonal element of  
401  $\Sigma$  can be lower bounded by a constant  $\nu$  with probability  $1 - \delta$ . Then the minimum eigenvalue of  
402  $\frac{1}{n} \bar{\mathbf{X}}^\top \bar{\mathbf{X}} + \mu \Sigma$  is lower bounded by

$$\min(c_1, c_2 \mu)$$

403 with probability  $1 - cn^2 \cdot \exp(-c'n) - \delta$  for some positive constants  $c_1, c_2, c, c' > 0$  that only depend  
404 on  $\gamma$ .

405 The proof of Lemma 3 is shown in Appendix B.6. Note that

$$\bar{\mathbf{S}}_n = \left( \frac{1}{n} \bar{\mathbf{X}}_P^\top \bar{\mathbf{X}}_P + \mu_n \tilde{\Sigma}_P^{-1} \right)^{-1}$$

406 where  $\bar{\mathbf{X}}_P = \tilde{\mathbf{X}}_P \tilde{\Sigma}_P^{-1/2}$  is a standard Gaussian matrix. Further, the  $\frac{n}{2}$  smallest eigenvalue of  $\tilde{\Sigma}_P^{-1}$  is  
 407  $\frac{n^\kappa}{(2p)^\kappa}$  which converges to a constant  $(\frac{\beta}{2\alpha})^\kappa$ . Hence, by Lemma 3, we know  $\|\bar{\mathbf{S}}_n\|_2$  is upper bounded  
 408 by  $O_p(\frac{1}{\mu_n})$  and thus,  $\frac{\mu_n}{n} \text{tr}(\tilde{\Sigma}_P \bar{\mathbf{S}}_n) = O_p(1)$ . This completes the proof of Proposition 1.  $\square$

**Proposition 2.**

$$\sup_i |\Delta_i| = O_p\left(\frac{\ln N}{\sqrt{N}}\right).$$

409 *Proof.* Let us introduce  $\bar{\mathbf{S}}_n^{\setminus i} = \tilde{\Sigma}_P^{1/2} \mathbf{S}_n^{\setminus i} \tilde{\Sigma}_P^{1/2}$  and  $\bar{\mathbf{x}}_i = \tilde{\Sigma}_P^{-1/2} \tilde{\mathbf{x}}_i$ . Then,

$$\bar{\mathbf{S}}_n^{\setminus i} = \left( \frac{1}{n} \bar{\mathbf{X}}_P^\top \bar{\mathbf{X}}_P - \frac{1}{n} \bar{\mathbf{x}}_i \bar{\mathbf{x}}_i^\top + \mu_n \tilde{\Sigma}_P^{-1} \right)^{-1}, \quad (47)$$

410 where  $\bar{\mathbf{x}}_i$  is the  $i$ th row of  $\bar{\mathbf{X}}_P$ . Further, we have

$$\Delta_i = \frac{\mu_n}{n} \text{tr}(\bar{\mathbf{S}}_n) - \frac{\mu_n}{n} \bar{\mathbf{x}}_i^\top \bar{\mathbf{S}}_n^{\setminus i} \bar{\mathbf{x}}_i - \mu_n.$$

411 To bound  $|\Delta_i|$ , we can decompose  $\Delta_i$  into three parts:

$$\Delta_i = \left( \frac{\mu_n}{n} \text{tr}(\bar{\mathbf{S}}_n) - \frac{\mu_n}{n} \text{tr}(\bar{\mathbf{S}}_n^{\setminus i}) \right) + \left( \frac{\mu_n}{n} \text{tr}(\bar{\mathbf{S}}_n^{\setminus i}) - \frac{\mu_n}{n} \bar{\mathbf{x}}_i^\top \bar{\mathbf{S}}_n^{\setminus i} \bar{\mathbf{x}}_i \right) - \mu_n$$

412 Intuitively, the first part should be small since  $\bar{\mathbf{S}}_n$  and  $\bar{\mathbf{S}}_n^{\setminus i}$  only differ at one sample. For the second  
 413 part, since  $\bar{\mathbf{x}}_i$  is independent of  $\bar{\mathbf{S}}_n^{\setminus i}$ , the law of large numbers implies that it should be small as well.  
 414 Finally, we have  $\mu_n \rightarrow 0$ . We now make these arguments rigorous. By Lemma 3 again, we have

$$\max\left(\|\bar{\mathbf{S}}_n\|_2, \max_i \|\bar{\mathbf{S}}_n^{\setminus i}\|_2\right) \leq O_p\left(\frac{1}{\mu_n}\right). \quad (48)$$

415 Then, we can show that the difference between  $\frac{\mu_n}{n} \text{tr}(\bar{\mathbf{S}}_n)$  and  $\frac{\mu_n}{n} \text{tr}(\bar{\mathbf{S}}_n^{\setminus i})$  is small. Note that, by  
 416 the Sherman-Morrison formula,

$$\begin{aligned} \sup_i \left| \frac{\mu_n}{n} \text{tr}(\bar{\mathbf{S}}_n) - \frac{\mu_n}{n} \text{tr}(\bar{\mathbf{S}}_n^{\setminus i}) \right| &= \sup_i \left| \frac{\mu_n}{n} \text{tr} \left( \frac{\bar{\mathbf{S}}_n^{\setminus i} \bar{\mathbf{x}}_i \bar{\mathbf{x}}_i^\top \bar{\mathbf{S}}_n^{\setminus i}}{n + \bar{\mathbf{x}}_i^\top \bar{\mathbf{S}}_n^{\setminus i} \bar{\mathbf{x}}_i} \right) \right| = \sup_i \frac{1}{n} \frac{\mu_n \bar{\mathbf{x}}_i^\top (\bar{\mathbf{S}}_n^{\setminus i})^2 \bar{\mathbf{x}}_i}{n + \bar{\mathbf{x}}_i^\top \bar{\mathbf{S}}_n^{\setminus i} \bar{\mathbf{x}}_i} \\ &< \sup_i \frac{1}{n} \frac{\mu_n \bar{\mathbf{x}}_i^\top (\bar{\mathbf{S}}_n^{\setminus i})^2 \bar{\mathbf{x}}_i}{\bar{\mathbf{x}}_i^\top \bar{\mathbf{S}}_n^{\setminus i} \bar{\mathbf{x}}_i} \leq \sup_i \frac{\mu_n}{n} \cdot O_p\left(\frac{1}{\mu_n}\right) \cdot \frac{\bar{\mathbf{x}}_i^\top \bar{\mathbf{S}}_n^{\setminus i} \bar{\mathbf{x}}_i}{\bar{\mathbf{x}}_i^\top \bar{\mathbf{S}}_n^{\setminus i} \bar{\mathbf{x}}_i} = O_p\left(\frac{1}{n}\right). \end{aligned}$$

417 Then we want to show the difference between  $\frac{\mu_n}{n} \text{tr}(\bar{\mathbf{S}}_n^{\setminus i})$  and  $\frac{\mu_n}{n} \bar{\mathbf{x}}_i^\top \bar{\mathbf{S}}_n^{\setminus i} \bar{\mathbf{x}}_i$  is small. Note that  $\bar{\mathbf{x}}_i^\top$   
 418 is a standard Gaussian vector and it is independent of  $\bar{\mathbf{S}}_n^{\setminus i}$ . Hence, the expectation of  $\frac{\mu_n}{n} \bar{\mathbf{x}}_i^\top \bar{\mathbf{S}}_n^{\setminus i} \bar{\mathbf{x}}_i$  is  
 419 given by  $\frac{\mu_n}{n} \text{tr}(\bar{\mathbf{S}}_n^{\setminus i})$ . Further, by standard  $\chi^2$  tail bounds [10], we have

$$\mathbb{P} \left( \max_i \left| \frac{\mu_n}{n} \bar{\mathbf{x}}_i^\top \bar{\mathbf{S}}_n^{\setminus i} \bar{\mathbf{x}}_i - \frac{\mu_n}{n} \text{tr}(\bar{\mathbf{S}}_n^{\setminus i}) \right| \geq \frac{2\mu_n p}{n} (\epsilon + \epsilon^2) \|\bar{\mathbf{S}}_n^{\setminus i}\| \right) \leq e^{-\epsilon^2 p}. \quad (49)$$

420 Choose  $\epsilon = \frac{\log n}{\sqrt{p}}$ , we know

$$\sup_i \left| \frac{\mu_n}{n} \bar{\mathbf{x}}_i^\top \bar{\mathbf{S}}_n^{\setminus i} \bar{\mathbf{x}}_i - \frac{\mu_n}{n} \text{tr}(\bar{\mathbf{S}}_n^{\setminus i}) \right| = O_p\left(\frac{\ln N}{\sqrt{N}}\right). \quad (50)$$

421 Hence, we have

$$|\Delta_i| \leq \sup_i \left| \frac{\mu_n}{n} \text{tr}(\bar{\mathbf{S}}_n) - \frac{\mu_n}{n} \text{tr}(\bar{\mathbf{S}}_n^{\setminus i}) \right| + \sup_i \left| \frac{\mu_n}{n} \bar{\mathbf{x}}_i^\top \bar{\mathbf{S}}_n^{\setminus i} \bar{\mathbf{x}}_i - \frac{\mu_n}{n} \text{tr}(\bar{\mathbf{S}}_n^{\setminus i}) \right| + |\mu_n| = O_p\left(\frac{\ln N}{\sqrt{N}}\right).$$

422  $\square$

### 423 B.3 Analysis of part 2

424 In this section, we will prove that

$$\text{part 2} \xrightarrow{P} N^{1-\kappa} \cdot \frac{m'_\kappa(0)}{m_\kappa^2(0)} \cdot \int_\alpha^1 t^{\kappa-2} dt + o_p(N^{1-\kappa}).$$

425 We apply a proof similar to that of Theorem 1 in Appendix A. The conditional expectation of part 2  
426 given  $\mathbf{X}_P$  is

$$\mathbb{E}[\text{part 2} \mid \mathbf{X}_P] = \text{tr}(\Sigma_{P^c}) \cdot \left( \text{tr} \left( \Sigma_P \mathbf{X}_P^\top (\mathbf{X}_P \mathbf{X}_P^\top)^{-2} \mathbf{X}_P \right) + 1 \right). \quad (51)$$

427 (This expectation only conditions on  $\mathbf{X}_P$ ; in particular, it averages over  $\mathbf{X}_{P^c}$ .) The variance of part  
428 2 given  $\mathbf{X}_P$  is

$$\begin{aligned} \text{var}(\text{part 2} \mid \mathbf{X}_P) &\leq 2 \cdot \text{tr}(\Sigma_{P^c}^2) \cdot \left\| (\mathbf{X}_P \mathbf{X}_P^\top)^{-1} \mathbf{X}_P \Sigma_P \mathbf{X}_P^\top (\mathbf{X}_P \mathbf{X}_P^\top)^{-1} \right\|_F^2 \\ &= 2 \cdot \text{tr}(\Sigma_{P^c}^2) \cdot \text{tr} \left( \left( \Sigma_P \mathbf{X}_P^\top (\mathbf{X}_P \mathbf{X}_P^\top)^{-2} \mathbf{X}_P \right)^2 \right). \end{aligned} \quad (52)$$

429 Let

$$\psi := \text{tr} \left( \Sigma_P \mathbf{X}_P^\top (\mathbf{X}_P \mathbf{X}_P^\top)^{-2} \mathbf{X}_P \right).$$

430 Then by Markov's inequality, we have

$$\text{part 2} = \text{tr}(\Sigma_{P^c}) \cdot (\psi + 1) + O_p \left( \frac{\sqrt{N-p}}{N^\kappa} \cdot \psi \right). \quad (53)$$

431 By (29), we have

$$\text{tr}(\Sigma_{P^c}) \rightarrow N^{1-\kappa} \int_\alpha^1 t^{-\kappa} dt.$$

432 Hence, we just need to show

$$\psi + 1 \xrightarrow{P} \frac{m'_\kappa(0)}{m_\kappa^2(0)}, \quad (54)$$

433 as this will imply

$$\text{part 2} \xrightarrow{P} N^{1-\kappa} \cdot \frac{m'_\kappa(0)}{m_\kappa^2(0)} \cdot \int_\alpha^1 t^{-\kappa} dt + o_p(N^{1-\kappa})$$

434 as required.

435 To prove (54), let us first rescale  $\Sigma$  to  $\tilde{\Sigma}$  and introduce the positive sequence  $(\mu_n)_{n \geq 1}$  just like what  
436 we did for part 1, and with foresight, we pick the sequence such that

$$\mu_n = o(N^{-\kappa}).$$

437 Then we have

$$\begin{aligned} \psi + 1 &= \text{tr} \left( \tilde{\Sigma}_P \tilde{\mathbf{X}}_P^\top \left( \tilde{\mathbf{X}}_P \tilde{\mathbf{X}}_P^\top \right)^{-2} \tilde{\mathbf{X}}_P \right) + 1 \\ &= \frac{1}{n} \text{tr} \left( \tilde{\Sigma}_P \left( \frac{1}{n} \tilde{\mathbf{X}}_P^\top \tilde{\mathbf{X}}_P + \mu_n \mathbf{I} \right)^{-1} \left( \frac{1}{n} \tilde{\mathbf{X}}_P^\top \tilde{\mathbf{X}}_P \right) \left( \frac{1}{n} \tilde{\mathbf{X}}_P^\top \tilde{\mathbf{X}}_P + \mu_n \mathbf{I} \right)^{-1} \right) + \epsilon'_{\mu_n} + 1 \\ &= \frac{1}{n} \text{tr} \left( \tilde{\Sigma}_P \tilde{\mathbf{S}}_n \right) - \frac{\mu_n}{n} \text{tr} \left( \tilde{\Sigma}_P \tilde{\mathbf{S}}_n^2 \right) + 1 + \epsilon'_{\mu_n}, \end{aligned}$$

438 where  $\epsilon'_{\mu_n}$  is given by

$$\begin{aligned} \epsilon'_{\mu_n} &= \frac{1}{n} \text{tr} \left( \tilde{\Sigma}_P \frac{1}{\sqrt{n}} \tilde{\mathbf{X}}_P^\top \left( \frac{1}{n} \tilde{\mathbf{X}}_P \tilde{\mathbf{X}}_P^\top \right)^{-2} \frac{1}{\sqrt{n}} \tilde{\mathbf{X}}_P \right) \\ &\quad - \frac{1}{n} \text{tr} \left( \tilde{\Sigma}_P \left( \frac{1}{n} \tilde{\mathbf{X}}_P^\top \tilde{\mathbf{X}}_P + \mu_n \mathbf{I} \right)^{-1} \left( \frac{1}{n} \tilde{\mathbf{X}}_P^\top \tilde{\mathbf{X}}_P \right) \left( \frac{1}{n} \tilde{\mathbf{X}}_P^\top \tilde{\mathbf{X}}_P + \mu_n \mathbf{I} \right)^{-1} \right). \end{aligned}$$



439 We shall prove the following:

$$|\epsilon'_{\mu_n}| = o_p(1), \quad (55)$$

440 and

$$\frac{1}{n} \text{tr} \left( \tilde{\Sigma}_P \tilde{S}_n \right) - \frac{\mu_n}{n} \text{tr} \left( \tilde{\Sigma}_P \tilde{S}_n^2 \right) + 1 \xrightarrow{P} \frac{m'_\kappa(0)}{m_\kappa^2(0)}, \quad (56)$$

441 which suffices to establish (54).

### 442 **B.3.1 Proof of Equation (55)**

443 To bound  $|\epsilon'_{\mu_n}|$ , note that

$$\begin{aligned} |\epsilon'_{\mu_n}| &\stackrel{(i)}{\leq} \frac{1}{n} \|\tilde{\Sigma}_P\|_2 \left( \text{tr} \left( \frac{1}{\sqrt{n}} \tilde{\mathbf{X}}_P^\top \left( \frac{1}{n} \tilde{\mathbf{X}}_P \tilde{\mathbf{X}}_P^\top \right)^{-2} \frac{1}{\sqrt{n}} \tilde{\mathbf{X}}_P \right) \right. \\ &\quad \left. - \text{tr} \left( \left( \frac{1}{n} \tilde{\mathbf{X}}_P^\top \tilde{\mathbf{X}}_P + \mu_n \mathbf{I} \right)^{-1} \left( \frac{1}{n} \tilde{\mathbf{X}}_P^\top \tilde{\mathbf{X}}_P \right) \left( \frac{1}{n} \tilde{\mathbf{X}}_P^\top \tilde{\mathbf{X}}_P + \mu_n \mathbf{I} \right)^{-1} \right) \right) \\ &\leq \frac{N^\kappa}{n} \cdot \sum_{i=1}^n \frac{\mu_n(2\tilde{\lambda}_i + \mu_n)}{(\tilde{\lambda}_i + \mu_n)^2 \tilde{\lambda}_i} \leq 2N^\kappa \cdot \frac{\mu_n}{\min_i(\tilde{\lambda}_i^2)}, \end{aligned} \quad (57)$$

444 where  $\tilde{\lambda}_i$  is the  $i$ -th eigenvalue of  $\frac{1}{n} \tilde{\mathbf{X}}_P \tilde{\mathbf{X}}_P^\top$  and inequality (i) holds due to the fact that

$$\frac{1}{\sqrt{n}} \tilde{\mathbf{X}}_P^\top \left( \frac{1}{n} \tilde{\mathbf{X}}_P \tilde{\mathbf{X}}_P^\top \right)^{-2} \frac{1}{\sqrt{n}} \tilde{\mathbf{X}}_P - \left( \frac{1}{n} \tilde{\mathbf{X}}_P^\top \tilde{\mathbf{X}}_P + \mu_n \mathbf{I} \right)^{-1} \left( \frac{1}{n} \tilde{\mathbf{X}}_P^\top \tilde{\mathbf{X}}_P \right) \left( \frac{1}{n} \tilde{\mathbf{X}}_P^\top \tilde{\mathbf{X}}_P + \mu_n \mathbf{I} \right)^{-1}$$

445 is positive semi-definite. By Lemma 1, Lemma 2, and (57), since  $\mu_n = o(N^{-\kappa})$ , we have

$$|\epsilon'_{\mu_n}| = o_p(1).$$

### 446 **B.3.2 Proof of Equation (56)**

447 We now prove

$$\frac{1}{n} \text{tr} \left( \tilde{\Sigma}_P \tilde{S}_n \right) - \frac{\mu_n}{n} \text{tr} \left( \tilde{\Sigma}_P \tilde{S}_n^2 \right) + 1 \xrightarrow{P} \frac{m'_\kappa(0)}{m_\kappa^2(0)}.$$

448 Towards this goal, we employ a strategy similar to the proof of (38). Using the identity  $\tilde{S}_n^{-1} - \mu_n \mathbf{I} =$   
449  $\frac{1}{n} \sum_{i=1}^n \tilde{\mathbf{x}}_i \tilde{\mathbf{x}}_i^\top$ , we have

$$\begin{aligned} \frac{1}{n} \sum_{i=1}^n \tilde{\mathbf{x}}_i^\top \tilde{S}_n^2 \tilde{\mathbf{x}}_i &= \frac{1}{n} \text{tr} \left( \sum_{i=1}^n \tilde{S}_n^2 \tilde{\mathbf{x}}_i \tilde{\mathbf{x}}_i^\top \right) \\ &= \text{tr} \left( \tilde{S}_n^2 (\tilde{S}_n^{-1} - \mu_n \mathbf{I}) \right) \\ &= \text{tr} \left( \tilde{S}_n - \mu_n \tilde{S}_n^2 \right). \end{aligned}$$

450 With (44), we have

$$\begin{aligned} \text{tr} \left( \tilde{S}_n - \mu_n \tilde{S}_n^2 \right) &= \frac{1}{n} \sum_{i=1}^n \tilde{\mathbf{x}}_i^\top \tilde{S}_n^2 \tilde{\mathbf{x}}_i \\ &= \frac{1}{n} \sum_{i=1}^n \tilde{\mathbf{x}}_i^\top \left( \tilde{S}_n^{\setminus i} - \frac{1}{n} \cdot \frac{\tilde{S}_n^{\setminus i} \tilde{\mathbf{x}}_i \tilde{\mathbf{x}}_i^\top \tilde{S}_n^{\setminus i}}{1 + \frac{1}{n} \tilde{\mathbf{x}}_i^\top \tilde{S}_n^{\setminus i} \tilde{\mathbf{x}}_i} \right)^2 \tilde{\mathbf{x}}_i \\ &= \sum_{i=1}^n \frac{\frac{1}{n} \tilde{\mathbf{x}}_i^\top \left( \tilde{S}_n^{\setminus i} \right)^2 \tilde{\mathbf{x}}_i}{\left( 1 + \frac{1}{n} \tilde{\mathbf{x}}_i^\top \tilde{S}_n^{\setminus i} \tilde{\mathbf{x}}_i \right)^2}. \end{aligned} \quad (58)$$

451 Note that  $\frac{1}{n} \text{tr} \left( \tilde{\mathbf{S}}_n - \mu_n \tilde{\mathbf{S}}_n^2 \right) = m_n(-\mu_n) - \mu_n m'_n(-\mu_n)$ . With (45) and (58), we have

$$\begin{aligned}
-\mu_n m'_n(-\mu_n) &= \frac{1}{n} \sum_{i=1}^n \frac{\frac{1}{n} \tilde{\mathbf{x}}_i^\top \left( \tilde{\mathbf{S}}_n^{\setminus i} \right)^2 \tilde{\mathbf{x}}_i}{\left( 1 + \frac{1}{n} \tilde{\mathbf{x}}_i^\top \tilde{\mathbf{S}}_n^{\setminus i} \tilde{\mathbf{x}}_i \right)^2} - m_n(-\mu_n) \\
&= \frac{1}{n} \sum_{i=1}^n \frac{\frac{1}{n} \tilde{\mathbf{x}}_i^\top \left( \tilde{\mathbf{S}}_n^{\setminus i} \right)^2 \tilde{\mathbf{x}}_i}{\left( 1 + \frac{1}{n} \tilde{\mathbf{x}}_i^\top \tilde{\mathbf{S}}_n^{\setminus i} \tilde{\mathbf{x}}_i \right)^2} - \frac{1}{n} \sum_{i=1}^n \frac{1}{\mu_n + \frac{\mu_n}{n} \tilde{\mathbf{x}}_i^\top \tilde{\mathbf{S}}_n^{\setminus i} \tilde{\mathbf{x}}_i} \\
&= \mu_n \cdot \frac{1}{n} \sum_{i=1}^n \frac{\frac{\mu_n}{n} \tilde{\mathbf{x}}_i^\top \left( \tilde{\mathbf{S}}_n^{\setminus i} \right)^2 \tilde{\mathbf{x}}_i - 1 - \frac{1}{n} \tilde{\mathbf{x}}_i^\top \tilde{\mathbf{S}}_n^{\setminus i} \tilde{\mathbf{x}}_i}{\left( \mu_n + \frac{\mu_n}{n} \tilde{\mathbf{x}}_i^\top \tilde{\mathbf{S}}_n^{\setminus i} \tilde{\mathbf{x}}_i \right)^2}.
\end{aligned}$$

452 Hence, we have

$$m'_n(-\mu_n) = \frac{1}{n} \sum_{i=1}^n \frac{1 + \frac{1}{n} \tilde{\mathbf{x}}_i^\top \left( \tilde{\mathbf{S}}_n^{\setminus i} - \mu_n \left( \tilde{\mathbf{S}}_n^{\setminus i} \right)^2 \right) \tilde{\mathbf{x}}_i}{\left( \mu_n + \frac{\mu_n}{n} \tilde{\mathbf{x}}_i^\top \tilde{\mathbf{S}}_n^{\setminus i} \tilde{\mathbf{x}}_i \right)^2}. \quad (59)$$

453 Note that

$$|m'_n(-\mu_n) - m'_n(0)| \leq \frac{2\mu_n}{\min(\tilde{\lambda}_i^3)},$$

454 where  $\tilde{\lambda}_1, \dots, \tilde{\lambda}_n$  are the eigenvalues of  $\frac{1}{n} \tilde{\mathbf{X}}_P \tilde{\mathbf{X}}_P^\top$ . Therefore, by Lemma 1, we have

$$m'_n(-\mu_n) = m'_n(0) + O_p(\mu_n) \xrightarrow{P} m'_\kappa(0).$$

455 From (38), Proposition 1, and Proposition 2, we know that

$$\left( \mu_n + \frac{\mu_n}{n} \tilde{\mathbf{x}}_i^\top \tilde{\mathbf{S}}_n^{\setminus i} \tilde{\mathbf{x}}_i \right)^2 \xrightarrow{P} \frac{1}{m_\kappa^2(0)} > 0. \quad (60)$$

456 We claim that

$$\frac{1}{n} \text{tr} \left( \tilde{\Sigma}_P \tilde{\mathbf{S}}_n - \mu_n \tilde{\Sigma}_P \tilde{\mathbf{S}}_n^2 \right) = O_p(1), \quad (61)$$

$$\frac{1}{n} \tilde{\mathbf{x}}_i^\top \left( \tilde{\mathbf{S}}_n^{\setminus i} - \mu_n \left( \tilde{\mathbf{S}}_n^{\setminus i} \right)^2 \right) \tilde{\mathbf{x}}_i = \frac{1}{n} \text{tr} \left( \tilde{\Sigma}_P \tilde{\mathbf{S}}_n - \mu_n \tilde{\Sigma}_P \tilde{\mathbf{S}}_n^2 \right) + O_p \left( \frac{\ln N}{\sqrt{N}} \right) \quad (62)$$

457 (Proposition 3 and Proposition 4 below). So, we obtain from (59)

$$m'_n(-\mu_n) = \frac{1}{n} \sum_{i=1}^n \frac{1 + \frac{1}{n} \tilde{\mathbf{x}}_i^\top \left( \tilde{\mathbf{S}}_n^{\setminus i} - \mu_n \left( \tilde{\mathbf{S}}_n^{\setminus i} \right)^2 \right) \tilde{\mathbf{x}}_i}{\left( \mu_n + \frac{\mu_n}{n} \tilde{\mathbf{x}}_i^\top \tilde{\mathbf{S}}_n^{\setminus i} \tilde{\mathbf{x}}_i \right)^2} \xrightarrow{P} \frac{1 + \frac{1}{n} \text{tr} \left( \tilde{\Sigma}_P \tilde{\mathbf{S}}_n - \mu_n \tilde{\Sigma}_P \tilde{\mathbf{S}}_n^2 \right)}{1/m_\kappa(0)^2},$$

458 i.e.,

$$\frac{m'_n(-\mu_n)}{m_\kappa(0)^2} \xrightarrow{P} 1 + \frac{1}{n} \text{tr} \left( \tilde{\Sigma}_P \tilde{\mathbf{S}}_n - \mu_n \tilde{\Sigma}_P \tilde{\mathbf{S}}_n^2 \right).$$

459 This suffices to prove (56) as required.

### 460 B.3.3 Supporting propositions

**Proposition 3.**

$$\frac{1}{n} \text{tr} \left( \tilde{\Sigma}_P \tilde{S}_n - \mu_n \tilde{\Sigma}_P \tilde{S}_n^2 \right) = O_p(1).$$

461 *Proof.* Recall that

$$\bar{S}_n = \tilde{\Sigma}_P^{1/2} \tilde{S}_n \tilde{\Sigma}_P^{1/2} = \left( \frac{1}{n} \bar{X}_P^\top \bar{X}_P + \mu_n \tilde{\Sigma}_P^{-1} \right)^{-1},$$

462 where  $\bar{X}_P = \tilde{X}_P \tilde{\Sigma}_P^{-1/2}$  is a standard Gaussian matrix. Let  $\frac{1}{n} \bar{X}_P^\top \bar{X}_P = U \Lambda U^\top$  be the singular  
463 value decomposition of  $\frac{1}{n} \bar{X}_P^\top \bar{X}_P$ , where  $U U^\top = I$  and  $\Lambda$  is a diagonal matrix with

$$\Lambda_{1,1} \geq \Lambda_{2,2} \geq \dots \geq \Lambda_{n,n} \geq \Lambda_{n+1,n+1} = \dots = \Lambda_{p,p} = 0.$$

464 Hence, we have

$$\begin{aligned} \tilde{\Sigma}_P^{1/2} \tilde{S}_n \tilde{\Sigma}_P^{1/2} - \mu_n \tilde{\Sigma}_P^{1/2} \tilde{S}_n^2 \tilde{\Sigma}_P^{1/2} &= \bar{S}_n \left( \frac{1}{n} \bar{X}_P^\top \bar{X}_P \right) \bar{S}_n \\ &= \left( \Lambda + \mu_n U^\top \tilde{\Sigma}_P^{-1} U \right)^{-1} \Lambda \left( \Lambda + \mu_n U^\top \tilde{\Sigma}_P^{-1} U \right)^{-1}. \end{aligned}$$

465 Our next step is to bound the maximum eigenvalue of

$$\left( \Lambda + \mu_n U^\top \tilde{\Sigma}_P^{-1} U \right)^{-1} \Lambda \left( \Lambda + \mu_n U^\top \tilde{\Sigma}_P^{-1} U \right)^{-1}.$$

466 Let  $\phi_n$  be the smallest eigenvalue of  $\tilde{\Sigma}_P^{-1}$ . Define  $\Lambda_\phi = \Lambda + \frac{\mu_n \phi_n}{2} I$  and  $\Sigma_\phi^{-1} = \mu_n (\tilde{\Sigma}_P^{-1} - \frac{\phi_n}{2} I)$ .

467 Then  $\Lambda_\phi$  and  $\Sigma_\phi$  are two positive definite diagonal matrices. Intuitively, for  $\mu_n$  small enough,

$$\left( \Lambda + \mu_n U^\top \tilde{\Sigma}_P^{-1} U \right)^{-1} \Lambda \left( \Lambda + \mu_n U^\top \tilde{\Sigma}_P^{-1} U \right)^{-1} \approx \Lambda_\phi^{-1} \Lambda \Lambda_\phi^{-1},$$

468 the latter having a maximum eigenvalue bounded by a constant. We now make this argument rigorous.

469 By the Sherman-Morrison formula, we have

$$\begin{aligned} \left( \Lambda + \mu_n U^\top \tilde{\Sigma}_P^{-1} U \right)^{-1} &= \left( \Lambda_\phi + U^\top \Sigma_\phi^{-1} U \right)^{-1} \\ &= \Lambda_\phi^{-1} - \Lambda_\phi^{-1} U^\top \left( \Sigma_\phi + U^\top \Lambda_\phi^{-1} U \right)^{-1} U \Lambda_\phi^{-1}. \end{aligned}$$

470 Hence, we know

$$\begin{aligned} &\left\| \left( \Lambda + \mu_n U^\top \tilde{\Sigma}_P^{-1} U \right)^{-1} \Lambda \left( \Lambda + \mu_n U^\top \tilde{\Sigma}_P^{-1} U \right)^{-1} \right\|_2 \\ &\leq 2 \left\| \Lambda_\phi^{-1} \Lambda \Lambda_\phi^{-1} \right\|_2 \\ &\quad + 2 \left\| \Lambda_\phi^{-1} U^\top \left( \Sigma_\phi + U^\top \Lambda_\phi^{-1} U \right)^{-1} U \Lambda_\phi^{-1} \Lambda \Lambda_\phi^{-1} U^\top \left( \Sigma_\phi + U^\top \Lambda_\phi^{-1} U \right)^{-1} U \Lambda_\phi^{-1} \right\|_2 \\ &\leq 2 \left\| \Lambda_\phi^{-1} \Lambda \Lambda_\phi^{-1} \right\|_2 \left( 1 + \left\| \Lambda_\phi^{-1} U^\top \left( \Sigma_\phi + U^\top \Lambda_\phi^{-1} U \right)^{-1} U U^\top \left( \Sigma_\phi + U^\top \Lambda_\phi^{-1} U \right)^{-1} U \Lambda_\phi^{-1} \right\|_2 \right) \\ &= 2 \left\| \Lambda_\phi^{-1} \Lambda \Lambda_\phi^{-1} \right\|_2 \left( 1 + \left\| \Lambda_\phi^{-1} \left( U \Sigma_\phi U^\top + \Lambda_\phi^{-1} \right)^{-2} \Lambda_\phi^{-1} \right\|_2 \right) \\ &= 2 \left\| \Lambda_\phi^{-1} \Lambda \Lambda_\phi^{-1} \right\|_2 \left( 1 + \left\| \left( \Lambda_\phi \left( U \Sigma_\phi U^\top + \Lambda_\phi^{-1} \right)^2 \Lambda_\phi \right)^{-1} \right\|_2 \right) \\ &= 2 \left\| \Lambda_\phi^{-1} \Lambda \Lambda_\phi^{-1} \right\|_2 \left( 1 + \left\| \left( I + \Lambda_\phi \left( U \Sigma_\phi U^\top \Lambda_\phi^{-1} + \Lambda_\phi^{-1} U \Sigma_\phi U^\top + (U \Sigma_\phi U^\top)^2 \right) \Lambda_\phi \right)^{-1} \right\|_2 \right) \\ &\leq 4 \left\| \Lambda_\phi^{-1} \Lambda \Lambda_\phi^{-1} \right\|_2. \end{aligned}$$

471 Note that  $\Lambda_\phi$  and  $\Lambda$  are both diagonal. Hence, we have

$$\|\Lambda_\phi^{-1} \Lambda \Lambda_\phi^{-1}\|_2 = \max_{1 \leq i \leq n} \frac{\Lambda_{i,i}}{\left(\Lambda_{i,i} + \frac{\phi_n \mu_n}{2}\right)^2} \leq \frac{1}{\Lambda_{n,n}}.$$

472 To lower bound  $\Lambda_{n,n}$ , we use the following lemma.

473 **Lemma 4** (Lemma 10 of 19). *Let  $\mathbf{X} \in \mathbb{R}^{n \times p}$  be a standard Gaussian random matrix, and let  $\mathbf{x}_i$*   
 474 *be the  $i$ -th row of the matrix  $\mathbf{X}$ . Let  $\rho = n/p > 1$ . There exist constants  $c, c' > 0$  such that for*  
 475 *large enough  $n$ , with probability at least  $1 - c'(p^2 + n^2)e^{-cn}$ , the eigenvalues of  $\frac{1}{n} \mathbf{X}^\top \mathbf{X}$  and of*  
 476  *$\frac{1}{n}(\mathbf{X}^\top \mathbf{X} - \mathbf{x}_i \mathbf{x}_i^\top)$  for each  $i = 1, \dots, n$  are contained in the interval*

$$\left(\frac{1}{2} \cdot \min\left\{(1 - 1/\sqrt{\rho})^2, 1/\rho\right\}, 9\rho^2\right).$$

477 Hence, by Lemma 4, we have  $\Lambda_{n,n} \geq \frac{1}{2} \min((1 - \sqrt{\beta/\alpha})^2, \beta/\alpha) > 0$  hold with probability  
 478  $1 - c \cdot n^2 \exp(-c'n)$  for some absolute constants  $c, c' > 0$ . Hence, we have

$$\left\| \bar{\mathbf{S}}_n \left( \frac{1}{n} \bar{\mathbf{X}}_P^\top \bar{\mathbf{X}}_P \right) \bar{\mathbf{S}}_n \right\|_2 \leq O_p(1) \quad (63)$$

479 as required.  $\square$

**Proposition 4.**

$$\frac{1}{n} \tilde{\mathbf{x}}_i^\top \left( \tilde{\mathbf{S}}_n^{\setminus i} - \mu_n \left( \tilde{\mathbf{S}}_n^{\setminus i} \right)^2 \right) \tilde{\mathbf{x}}_i = \frac{1}{n} \text{tr} \left( \tilde{\Sigma}_P \tilde{\mathbf{S}}_n - \mu_n \tilde{\Sigma}_P \tilde{\mathbf{S}}_n^2 \right) + O_p \left( \frac{\ln N}{\sqrt{N}} \right).$$

480 *Proof.* It is clear that we just need to prove the following two arguments

$$\sup_i \left| \frac{1}{n} \tilde{\mathbf{x}}_i^\top \left( \tilde{\mathbf{S}}_n^{\setminus i} - \mu_n \left( \tilde{\mathbf{S}}_n^{\setminus i} \right)^2 \right) \tilde{\mathbf{x}}_i - \frac{1}{n} \text{tr} \left( \tilde{\Sigma}_P \tilde{\mathbf{S}}_n^{\setminus i} - \mu_n \tilde{\Sigma}_P \left( \tilde{\mathbf{S}}_n^{\setminus i} \right)^2 \right) \right| = O_p \left( \frac{\ln N}{\sqrt{N}} \right) \quad (64)$$

$$\sup_i \left| \frac{1}{n} \text{tr} \left( \tilde{\Sigma}_P \tilde{\mathbf{S}}_n - \mu_n \tilde{\Sigma}_P \left( \tilde{\mathbf{S}}_n \right)^2 \right) - \frac{1}{n} \text{tr} \left( \tilde{\Sigma}_P \tilde{\mathbf{S}}_n^{\setminus i} - \mu_n \tilde{\Sigma}_P \left( \tilde{\mathbf{S}}_n^{\setminus i} \right)^2 \right) \right| = O_p \left( \frac{\ln N}{\sqrt{N}} \right). \quad (65)$$

481 To show (64), we use a proof similar to that of (63). By Lemma 4, we know

$$\max_i \left\| \bar{\mathbf{S}}_n^{\setminus i} \left( \frac{1}{n} \bar{\mathbf{X}}_P^\top \bar{\mathbf{X}}_P - \frac{1}{n} \bar{\mathbf{x}}_i \bar{\mathbf{x}}_i^\top \right) \bar{\mathbf{S}}_n^{\setminus i} \right\|_2 = O_p(1). \quad (66)$$

482 Note that

$$\begin{aligned} \tilde{\mathbf{x}}_i^\top \left( \tilde{\mathbf{S}}_n^{\setminus i} - \mu_n \left( \tilde{\mathbf{S}}_n^{\setminus i} \right)^2 \right) \tilde{\mathbf{x}}_i &= \bar{\mathbf{x}}_i^\top \tilde{\Sigma}_P^{1/2} \left( \tilde{\mathbf{S}}_n^{\setminus i} - \mu_n \left( \tilde{\mathbf{S}}_n^{\setminus i} \right)^2 \right) \tilde{\Sigma}_P^{1/2} \bar{\mathbf{x}}_i \\ &= \bar{\mathbf{x}}_i^\top \left( \bar{\mathbf{S}}_n^{\setminus i} \left( \frac{1}{n} \bar{\mathbf{X}}_P^\top \bar{\mathbf{X}}_P - \frac{1}{n} \bar{\mathbf{x}}_i \bar{\mathbf{x}}_i^\top \right) \bar{\mathbf{S}}_n^{\setminus i} \right) \bar{\mathbf{x}}_i. \end{aligned}$$

483 Furthermore,  $\tilde{\mathbf{x}}_i$  is a standard Gaussian vector, and it is independent of the matrix

$$\bar{\mathbf{S}}_n^{\setminus i} \left( \frac{1}{n} \bar{\mathbf{X}}_P^\top \bar{\mathbf{X}}_P - \frac{1}{n} \bar{\mathbf{x}}_i \bar{\mathbf{x}}_i^\top \right) \bar{\mathbf{S}}_n^{\setminus i}.$$

484 Hence, we apply the same proof of (50) with (66) and Lemma 1 of [10]; this gives

$$\sup_i \left| \frac{1}{n} \bar{\mathbf{x}}_i^\top \tilde{\Sigma}_P^{1/2} \left( \tilde{\mathbf{S}}_n^{\setminus i} - \mu_n \left( \tilde{\mathbf{S}}_n^{\setminus i} \right)^2 \right) \tilde{\Sigma}_P^{1/2} \bar{\mathbf{x}}_i - \frac{1}{n} \text{tr} \left( \tilde{\Sigma}_P^{1/2} \left( \tilde{\mathbf{S}}_n^{\setminus i} - \mu_n \left( \tilde{\mathbf{S}}_n^{\setminus i} \right)^2 \right) \tilde{\Sigma}_P^{1/2} \right) \right| = O_p \left( \frac{\ln N}{\sqrt{N}} \right).$$

485 Hence, (64) holds. Therefore, it remains to show (65), which is equivalent to

$$\sup_i \left| \frac{1}{n} \text{tr} \left( \bar{\mathbf{S}}_n \left( \frac{1}{n} \bar{\mathbf{X}}_P^\top \bar{\mathbf{X}}_P \right) \bar{\mathbf{S}}_n \right) - \frac{1}{n} \text{tr} \left( \bar{\mathbf{S}}_n^{\setminus i} \left( \frac{1}{n} \bar{\mathbf{X}}_P^\top \bar{\mathbf{X}}_P - \frac{1}{n} \bar{\mathbf{x}}_i \bar{\mathbf{x}}_i^\top \right) \bar{\mathbf{S}}_n^{\setminus i} \right) \right| = O_p \left( \frac{\ln N}{\sqrt{N}} \right). \quad (67)$$

486 By the Sherman-Morrison formula, we have

$$\bar{\mathbf{S}}_n = \bar{\mathbf{S}}_n^{\setminus i} - \frac{\bar{\mathbf{S}}_n^{\setminus i} \bar{\mathbf{x}}_i \bar{\mathbf{x}}_i^\top \bar{\mathbf{S}}_n^{\setminus i}}{n + \bar{\mathbf{x}}_i^\top \bar{\mathbf{S}}_n^{\setminus i} \bar{\mathbf{x}}_i},$$

487 and therefore

$$\begin{aligned} & \text{tr} \left( \bar{\mathbf{S}}_n \left( \frac{1}{n} \bar{\mathbf{X}}_P^\top \bar{\mathbf{X}}_P \right) \bar{\mathbf{S}}_n - \bar{\mathbf{S}}_n^{\setminus i} \left( \frac{1}{n} \bar{\mathbf{X}}_P^\top \bar{\mathbf{X}}_P - \frac{1}{n} \bar{\mathbf{x}}_i \bar{\mathbf{x}}_i^\top \right) \bar{\mathbf{S}}_n^{\setminus i} \right) \\ &= \text{tr} \left( \bar{\mathbf{S}}_n^{\setminus i} \left( \frac{1}{n} \bar{\mathbf{x}}_i \bar{\mathbf{x}}_i^\top \right) \bar{\mathbf{S}}_n^{\setminus i} \right) - 2 \cdot \text{tr} \left( \bar{\mathbf{S}}_n^{\setminus i} \left( \frac{1}{n} \bar{\mathbf{X}}_P^\top \bar{\mathbf{X}}_P \right) \frac{\bar{\mathbf{S}}_n^{\setminus i} \bar{\mathbf{x}}_i \bar{\mathbf{x}}_i^\top \bar{\mathbf{S}}_n^{\setminus i}}{n + \bar{\mathbf{x}}_i^\top \bar{\mathbf{S}}_n^{\setminus i} \bar{\mathbf{x}}_i} \right) \\ & \quad + \text{tr} \left( \frac{\bar{\mathbf{S}}_n^{\setminus i} \bar{\mathbf{x}}_i \bar{\mathbf{x}}_i^\top \bar{\mathbf{S}}_n^{\setminus i}}{n + \bar{\mathbf{x}}_i^\top \bar{\mathbf{S}}_n^{\setminus i} \bar{\mathbf{x}}_i} \left( \frac{1}{n} \bar{\mathbf{X}}_P^\top \bar{\mathbf{X}}_P \right) \frac{\bar{\mathbf{S}}_n^{\setminus i} \bar{\mathbf{x}}_i \bar{\mathbf{x}}_i^\top \bar{\mathbf{S}}_n^{\setminus i}}{n + \bar{\mathbf{x}}_i^\top \bar{\mathbf{S}}_n^{\setminus i} \bar{\mathbf{x}}_i} \right). \end{aligned} \quad (68)$$

488 Let  $\mathbf{M}_i = \bar{\mathbf{S}}_n^{\setminus i} \left( \frac{1}{n} \bar{\mathbf{X}}_P^\top \bar{\mathbf{X}}_P - \frac{1}{n} \bar{\mathbf{x}}_i \bar{\mathbf{x}}_i^\top \right) \bar{\mathbf{S}}_n^{\setminus i}$ . Let  $\rho = \frac{\mu_n}{n} \bar{\mathbf{x}}_i^\top \bar{\mathbf{S}}_n^{\setminus i} \bar{\mathbf{x}}_i$  and  $\tau = \frac{\mu_n^2}{n} \bar{\mathbf{x}}_i^\top \left( \bar{\mathbf{S}}_n^{\setminus i} \right)^2 \bar{\mathbf{x}}_i$ . Then,  
489 from (68), we have

$$\begin{aligned} & \sup_i \left| \frac{1}{n} \text{tr} \left( \bar{\mathbf{S}}_n \left( \frac{1}{n} \bar{\mathbf{X}}_P^\top \bar{\mathbf{X}}_P \right) \bar{\mathbf{S}}_n - \bar{\mathbf{S}}_n^{\setminus i} \left( \frac{1}{n} \bar{\mathbf{X}}_P^\top \bar{\mathbf{X}}_P - \frac{1}{n} \bar{\mathbf{x}}_i \bar{\mathbf{x}}_i^\top \right) \bar{\mathbf{S}}_n^{\setminus i} \right) \right| \\ &= \sup_i \left| \frac{\tau}{\mu_n^2 n} - \frac{2}{n} \cdot \left( \text{tr} \left( \mathbf{M}_i \frac{\frac{\mu_n}{n} \bar{\mathbf{x}}_i \bar{\mathbf{x}}_i^\top \bar{\mathbf{S}}_n^{\setminus i}}{\mu_n + \rho} \right) + \frac{\rho}{\mu_n + \rho} \frac{\tau}{\mu_n^2} \right) + \frac{1}{n} \frac{\tau}{(\mu_n + \rho)^2} \cdot \frac{1}{n} \bar{\mathbf{x}}_i^\top \mathbf{M}_i \bar{\mathbf{x}}_i + \frac{1}{\mu_n^2 n} \frac{\rho^2 \tau}{(\mu_n + \rho)^2} \right| \\ &= \sup_i \left| \frac{((\mu_n + \rho)^2 - 2\rho(\mu_n + \rho) + \rho^2) \tau}{\mu_n^2 n (\mu_n + \rho)^2} - \frac{2}{n} \cdot \text{tr} \left( \mathbf{M}_i \frac{\frac{\mu_n}{n} \bar{\mathbf{x}}_i \bar{\mathbf{x}}_i^\top \bar{\mathbf{S}}_n^{\setminus i}}{\mu_n + \rho} \right) + \frac{1}{n} \frac{\tau}{(\mu_n + \rho)^2} \cdot \frac{1}{n} \bar{\mathbf{x}}_i^\top \mathbf{M}_i \bar{\mathbf{x}}_i \right| \\ &\leq \sup_i \left( \frac{\tau}{n(\mu_n + \rho)^2} + \frac{2}{n(\mu_n + \rho)} \|\mathbf{M}_i\|_2 \cdot \frac{\mu_n}{n} \|\bar{\mathbf{x}}_i \bar{\mathbf{x}}_i^\top \bar{\mathbf{S}}_n^{\setminus i}\|_2 + \frac{\tau}{n(\mu_n + \rho)^2} \cdot \frac{1}{n} \|\bar{\mathbf{x}}_i\|_2^2 \|\mathbf{M}_i\|_2 \right) \\ &\leq \sup_i \left( \frac{\tau}{n(\mu_n + \rho)^2} + \frac{2}{n(\mu_n + \rho)} \|\mathbf{M}_i\|_2 \cdot \sqrt{\frac{1}{n} \|\bar{\mathbf{x}}_i\|_2^2 \cdot \tau} + \frac{\tau}{n(\mu_n + \rho)^2} \cdot \frac{1}{n} \|\bar{\mathbf{x}}_i\|_2^2 \|\mathbf{M}_i\|_2 \right). \end{aligned} \quad (69)$$

490 Our next step is to bound  $\rho, \tau, \sup_i \|\bar{\mathbf{x}}_i\|_2$  and  $\sup_i \|\mathbf{M}_i\|_2$ . Since the  $\bar{\mathbf{x}}_i$  are standard Gaussian  
491 vectors, standard  $\chi^2$  tail bounds [10] establish that  $\sup_i \frac{1}{n} \|\bar{\mathbf{x}}_i\|_2^2 = O_p(\ln N)$ . Then, by (48), we  
492 know

$$\tau = \frac{\mu_n^2}{n} \bar{\mathbf{x}}_i^\top \left( \bar{\mathbf{S}}_n^{\setminus i} \right)^2 \bar{\mathbf{x}}_i \leq \mu_n^2 \cdot O_p(\ln N) \cdot O_p \left( \frac{1}{\mu_n^2} \right) = O_p(\ln N).$$

Using Proposition 1, Proposition 2, and (47), we also have  $\rho = \Theta_p(1)$ . Finally, by (63), we have  $\sup_i \|\mathbf{M}_i\| = O_p(1)$ . Plug in these results in (69), we have

$$\sup_i \left| \frac{1}{n} \text{tr} \left( \bar{\mathbf{S}}_n \left( \frac{1}{n} \bar{\mathbf{X}}_P^\top \bar{\mathbf{X}}_P \right) \bar{\mathbf{S}}_n - \bar{\mathbf{S}}_n^{\setminus i} \left( \frac{1}{n} \bar{\mathbf{X}}_P^\top \bar{\mathbf{X}}_P - \frac{1}{n} \bar{\mathbf{x}}_i \bar{\mathbf{x}}_i^\top \right) \bar{\mathbf{S}}_n^{\setminus i} \right) \right| = O_p \left( \frac{\ln^2 N}{N} \right).$$

Hence (67) holds.  $\square$

#### B.4 Proof of Lemma 1

The first part of the lemma, Equation (40), follows from Theorem 2.38 of [18].

For the second part, to lower bound the minimum eigenvalue  $\lambda_{\min}$  of  $\frac{1}{n} \bar{\mathbf{X}} \mathbf{H} \bar{\mathbf{X}}^\top$ , we need to find the support of  $\mathcal{F}$ . From Section 4 of [16], we have

$$z \in \text{supp}(\mathcal{F})^c \Leftrightarrow m(z) \in B \text{ and } \frac{1}{m(z)^2} - \gamma \int_{\eta_1}^{\infty} \frac{t^2 f_h(t) dt}{(1 + t m(z))^2} > 0,$$

where  $B := \{m : m \neq 0, -m^{-1} \in \text{supp}(\mathcal{H})^c\}$ .

To show  $\lambda_{\min} > c_\epsilon > 0$  holds in probability for some small enough constant  $c_\epsilon$ , we just need to show that for all  $0 \leq z \leq c_\epsilon$ ,

$$m(z) > 0 \text{ and } \frac{1}{m(z)^2} - \gamma \int_{\eta_1}^{\infty} \frac{t^2}{(1 + t \cdot m(z))^2} \cdot f_h(t) dt > 0. \quad (70)$$

Note that the equation (40) defining  $m(z)$ , i.e.,

$$m(z) = - \left( z - \gamma \int_{\eta_1}^{\infty} \frac{t f_h(t) dt}{1 + t \cdot m(z)} \right)^{-1}, \quad \forall z \in \text{supp}(\mathcal{F})^c$$

is equivalent to

$$z = \gamma \int_{\eta_1}^{\infty} \frac{t}{1 + t \cdot m(z)} \cdot f_h(t) dt - \frac{1}{m(z)}, \quad \forall z \in \text{supp}(\mathcal{F})^c$$

Let us consider the “inverse” of  $m(z)$  defined by the following equation:

$$z(m) := \gamma \int_{\eta_1}^{\infty} \frac{t}{1 + t \cdot m} \cdot f_h(t) dt - \frac{1}{m}.$$

Note that

$$\inf_{m < 0} z(m) \geq \gamma > 1.$$

Hence, for all  $z \leq 1$ , if  $m(z)$  exists, we have  $m(z) > 0$ . Further, note that

$$\begin{aligned} \frac{dz(m)}{dm} > 0 &\Leftrightarrow \frac{1}{m(z)^2} - \gamma \int_{\eta_1}^{\infty} \frac{t^2}{(1 + t \cdot m(z))^2} \cdot f_h(t) dt > 0 \\ &\Leftrightarrow \gamma \int_{\eta_1}^{\infty} \frac{t^2}{(m^{-1} + t)^2} \cdot f_h(t) dt < 1. \end{aligned}$$

Moreover,  $\gamma \int_{\eta_1}^{\infty} \frac{t^2}{(m^{-1} + t)^2} \cdot f_h(t) dt$  is a continuous increasing function of  $m$  with

$$\begin{aligned} \gamma \int_{\eta_1}^{\infty} \frac{t^2}{(m^{-1} + t)^2} \cdot f_h(t) dt &\rightarrow 0 \text{ as } m \rightarrow 0 \\ \gamma \int_{\eta_1}^{\infty} \frac{t^2}{(m^{-1} + t)^2} \cdot f_h(t) dt &\rightarrow \gamma > 1 \text{ as } m \rightarrow \infty. \end{aligned}$$

Therefore, we know there exists a constant  $m_c$  such that for all  $0 < m < m_c$ ,  $z(m)$  is a strictly increasing function on  $m \in (0, m_c)$  and strictly decreasing function on  $m \in [m_c, \infty)$ . Thus, the conditions in (70) (with  $m$  in place of  $m(z)$ ) are met for all  $0 < m < m_c$ . Note that

$$m \cdot z(m) = \left( \gamma \int_{\eta_1}^{\infty} \frac{t}{1/m+t} \cdot f_h(t) dt - 1 \right) \rightarrow \begin{cases} -1, & \text{as } m \rightarrow 0^+ \\ \gamma - 1 > 0, & \text{as } m \rightarrow +\infty \end{cases},$$

Therefore, we have  $z(m) \rightarrow -\infty$  as  $m \rightarrow 0^+$  and  $z(m) \rightarrow 0^+$  as  $m \rightarrow \infty$ . Then, by continuity of the function  $z(m)$ , we know for any non-positive value  $z$ , the mapping between  $z$  and  $m > 0$  defined by (40) is an one to one mapping. Moreover, since the function  $z(m)$  is increasing on  $(0, m_c)$  and decreasing on  $[m_c, \infty)$ , there exists a unique  $m^*$  such that  $z(m^*) = 0$  and  $z(m)$  is a continuous and increasing function on  $[0, m^*]$ . Hence, we have  $m^* < m_c$ . This implies  $m(z)$  is a continuous increasing function on  $z \leq 0$ . Further, we can find a small enough constant  $\epsilon > 0$  such that  $m^* + \epsilon < m_c$  and  $0 < z(m^*) < 1$  ( $z$  is a function here). With  $c_\epsilon := z(m^* + \epsilon)$ , we have that for all  $0 \leq z \leq c_\epsilon$ , the conditions in (70) are met. Hence  $\lambda_{\min} > c_\epsilon > 0$  holds in probability.

Finally, by the dominated convergence theorem, we have

$$\lim_{n \rightarrow \infty} m_n(z) = m(z), \text{ a.s. and } \lim_{n \rightarrow \infty} m'_n(z) = m'(z), \text{ a.s. for } \forall z < 0.$$

For an increasing sequence  $z_n \rightarrow 0^-$ , note that for all  $\epsilon' > 0$ , we have  $|m_n(z_n) - m_n(-\epsilon')| \leq \frac{\epsilon' - z_n}{c_\epsilon^2}$  holds in probability. Further,  $m_n(-\epsilon') \rightarrow m(-\epsilon')$  almost surely and  $m(-\epsilon') \rightarrow m(0)$  as  $\epsilon' \rightarrow 0$ . Hence, for all  $\epsilon' > 0$ , we can choose a small enough  $\epsilon'' > 0$  such that

$$\begin{aligned} \mathbb{P}(|m_n(z_n) - m_n(-\epsilon'')| \leq \frac{\epsilon'}{3}) &\rightarrow 1 \\ \mathbb{P}(|m_n(-\epsilon'') - m(-\epsilon'')| \leq \frac{\epsilon'}{3}) &\rightarrow 1 \\ |m(-\epsilon'') - m(0)| &\leq \frac{\epsilon'}{3}. \end{aligned}$$

Hence, we have  $m_n(z_n) \xrightarrow{P} m(0)$ . Similarly, we have  $m'_n(z_n) \xrightarrow{P} m'(0)$ .

## B.5 Proof of Lemma 2

Let  $\sigma_n$  be the random variable that follows the empirical eigenvalue distribution of  $N^\kappa \Sigma_S$ . Since the minimum eigenvalue of  $N^\kappa \Sigma_S$  is  $\frac{N^\kappa}{p_2^2}$  and its maximum eigenvalue is  $\frac{N^\kappa}{(p_1+1)^\kappa}$ . Then for all  $t \in [\frac{N^\kappa}{p_2^2}, \frac{N^\kappa}{(p_1+1)^\kappa}]$ , we have

$$\begin{aligned} \mathbb{P}(\sigma_n > t) &= \frac{1}{|S|} \sum_{i=1+p_1}^{p_2} \mathbb{1}_{\{\frac{N^\kappa}{i^\kappa} > t\}} \\ &= \frac{1}{|S|} \max \left( 0, \left\lfloor \frac{N}{t^{1/\kappa}} \right\rfloor - p_1 \right) \\ &= \frac{1}{|S|} \left( \left\lfloor \frac{N}{t^{1/\kappa}} \right\rfloor - p_1 \right), \end{aligned}$$

where the last inequality is due to the fact that

$$\left\lfloor \frac{N}{t^{1/\kappa}} \right\rfloor \geq \left\lfloor \frac{N(p_1+1)}{N} \right\rfloor = \lfloor p_1 + 1 \rfloor \geq p_1.$$

Hence, as  $N \rightarrow \infty$ , we have

$$\mathbb{P}(\sigma_n > t) \rightarrow \begin{cases} 1, & t \leq \frac{1}{\alpha_2^\kappa} \\ \max \left( 0, \frac{1}{\alpha_2 - \alpha_1} \left( \frac{1}{t^{1/\kappa}} - \alpha_1 \right) \right), & t > \frac{1}{\alpha_2^\kappa} \end{cases}.$$

Hence, the probability density function for the limiting distribution of  $\sigma_n$  is indeed  $f(s)$  given by (42).

### 533 B.6 Proof of Lemma 3

534 Without loss of generality, we assume that the diagonal elements of  $\Sigma$  are in a non-increasing order.  
 535 We condition on the event where the  $\frac{n}{2}$  smallest diagonal elements of  $\Sigma$  are lower-bounded by  $\nu$ . The  
 536 minimum eigenvalue of

$$S = \left( \frac{1}{n} \bar{\mathbf{X}}^\top \bar{\mathbf{X}} + \mu \Sigma \right),$$

537 is given by

$$\sigma_{\min}(S) = \min_{\|v\|=1} v^\top \left( \frac{1}{n} \bar{\mathbf{X}}^\top \bar{\mathbf{X}} + \mu \Sigma \right) v.$$

538 Let  $v = (v_1, v_2)$  where  $v_1$  is the first  $p - \frac{n}{2}$  number of components of  $v$  and  $v_2$  is the last  $\frac{n}{2}$  number  
 539 of components of  $v$ . If  $\|v_1\|^2 \geq \frac{1}{400\gamma^2}$ , then immediately, we have

$$\sigma_{\min}(S) \geq \mu \|v_1\|^2 \nu \geq \mu \frac{\nu}{400\gamma^2}.$$

540 Otherwise, let  $\bar{\mathbf{X}} = (\bar{\mathbf{X}}_1, \bar{\mathbf{X}}_2)$  where  $\bar{\mathbf{X}}_1$  is the first  $p - \frac{n}{2}$  columns of  $\bar{\mathbf{X}}$  and  $\bar{\mathbf{X}}_2$  is the last  $\frac{n}{2}$   
 541 columns of  $\bar{\mathbf{X}}$ . Then we have

$$\begin{aligned} \sigma_{\min}(S) &\geq \min_{\|v\|=1, \|v_1\|^2 < \frac{1}{400\gamma^2}} \frac{1}{n} \|\bar{\mathbf{X}}_2 v_2\|^2 + \frac{1}{n} \|\bar{\mathbf{X}}_1 v_1\|^2 - 2 \frac{1}{n} \|\bar{\mathbf{X}}_1 v_1\| \cdot \|\bar{\mathbf{X}}_2 v_2\| \\ &= \min_{\|v\|=1, \|v_1\|^2 < \frac{1}{400\gamma^2}} \left( \frac{1}{\sqrt{n}} \|\bar{\mathbf{X}}_2 v_2\| - \frac{1}{\sqrt{n}} \|\bar{\mathbf{X}}_1 v_1\| \right)^2. \end{aligned}$$

542 Note that  $\mathbf{X}_2$  is a  $n \times \frac{n}{2}$  standard Gaussian matrix and therefore the minimum eigenvalue of  $\frac{1}{n} \mathbf{X}_2^\top \mathbf{X}_2$   
 543 can be lower bounded away from 0. Further  $\mathbf{X}_1$  is a  $n \times (p - \frac{n}{2})$  standard Gaussian matrix with  
 544  $\frac{p - \frac{n}{2}}{n} \rightarrow \gamma - \frac{1}{2}$  as  $p, n \rightarrow \infty$ . Hence the maximum eigenvalue of  $\frac{1}{n} \mathbf{X}_1^\top \mathbf{X}_1$  can be upper bounded. In  
 545 fact, from Lemma 4 (Lemma 10 of [19]), we have with probability  $1 - cn^2 \exp(-c'n)$ , we have

$$\min_{\|v\|=1} \frac{1}{n} \|\bar{\mathbf{X}}_2 v\|^2 \geq \frac{1}{25} \quad \text{and} \quad \max_{\|v\|=1} \frac{1}{n} \|\bar{\mathbf{X}}_1 v\|^2 \leq 9\gamma^2.$$

546 Hence, we have

$$\begin{aligned} \sqrt{\sigma_{\min}(S)} &\geq \min_{\|v\|=1, \|v_1\|^2 < \frac{1}{400\gamma^2}} \frac{1}{\sqrt{n}} \|\bar{\mathbf{X}}_2 v_2\| - \frac{1}{\sqrt{n}} \|\bar{\mathbf{X}}_1 v_1\| \\ &\geq \frac{1}{5} \sqrt{1 - \frac{1}{400\gamma^2}} - 3\gamma \cdot \frac{1}{20\gamma} \\ &\geq \frac{\sqrt{399}}{100} - \frac{3}{20} > 0. \end{aligned}$$

547 This completes the proof of this lemma.

### 548 C Analysis under polynomial eigenvalue decay with noise $\sigma > 0$

549 In this section, we consider analogues of Theorem 1–Theorem 3 that permit noisy independent  
 550 observations

$$y_i = \mathbf{x}_i^\top \boldsymbol{\theta} + w_i, \quad i = 1, \dots, n,$$

551 where  $\mathbf{w} = (w_1, \dots, w_n) \sim \mathcal{N}(\mathbf{0}, \sigma^2 \mathbf{I})$ , where we allow  $\sigma^2 > 0$ .

552 **Theorem 5.** Assume A.1 with constant  $\kappa$  and A.2 with constants  $\alpha$  and  $\beta$ .

553 (i) We have for all  $\alpha < \beta$ ,

$$\mathbb{E}_{\mathbf{w}, \boldsymbol{\theta}}[\text{Error}] \xrightarrow{P} \left( N^{1-\kappa} \int_{\alpha}^1 t^{-\kappa} dt + \sigma^2 \right) \cdot \frac{\beta}{\beta - \alpha} =: \mathcal{R}_{\kappa}(\alpha, \sigma), \quad \forall \alpha < \beta. \quad (71)$$



When  $\kappa > 1$ , the minimum of  $\mathcal{R}_\kappa(\alpha, \sigma)$  is achieved at  $\alpha = 0$  and the minimum risk is given by

$$\min_{\alpha < \beta} \mathcal{R}_\kappa(\alpha, \sigma) = \sigma^2. \quad (72)$$

When  $\kappa \leq 1$ , we have nearly the same results as in Theorem 1, i.e., the minimum of  $\mathcal{R}_\kappa(\alpha, \sigma)$  is achieved at  $\alpha^*$  which is the unique solution of the equation  $h_\kappa(\alpha) = 0$  on  $(0, \beta)$ , where  $h_\kappa(\alpha)$  is given by

$$h_\kappa(\alpha) := \frac{\beta}{\alpha} - \int_\alpha^1 t^{\kappa-2} dt - 1 - \sigma^2 \mathbb{1}_{\{\kappa=1\}}. \quad (73)$$

The minimum risk is therefore given by

$$\min_{\alpha < \beta} \mathcal{R}_\kappa(\alpha, \sigma) = N^{1-\kappa} \frac{\beta}{(\alpha^*)^\kappa}. \quad (74)$$

(ii) We have for all  $\alpha > \beta$ ,

$$\mathbb{E}_{\mathbf{w}, \theta}[\text{Error}] \xrightarrow{P} N^{1-\kappa} \frac{\beta}{m_\kappa(0)} + \left( N^{1-\kappa} \int_\alpha^1 t^{-\kappa} dt + \sigma^2 \right) \frac{m'_\kappa(0)}{m_\kappa^2(0)} =: \mathcal{R}_\kappa(\alpha, \sigma). \quad (75)$$

(iii) When  $\kappa > 1$ , the minimum risk for all  $\alpha < 1$  and  $\alpha \neq \beta$  is achieved at  $\alpha = 0$ , i.e.,  $p = o(n)$ . When  $\kappa < 1$ , let  $\alpha^*$  be the minimizer of  $\mathcal{R}_\kappa(\alpha, \sigma)$  over the interval  $[0, \beta)$ . Then  $\limsup_N \mathcal{R}_\kappa(1, \sigma) / \mathcal{R}_\kappa(\alpha^*, \sigma) < 1$ .

The proof of (i) can be easily derived from (28). The proof of (ii) can be easily derived as well from (15) and (54). For the proof of (iii), note that when  $\kappa < 1$ , the dominant part of the risk is the same as the noiseless case, so (iii) follows from the arguments in Theorem 3. When  $\kappa > 1$ , the dominant part of the risk is the noise, and therefore from (34), we have

$$\min_{\alpha > \beta} \mathcal{R}_\kappa(\alpha, \sigma) \geq \min_{\alpha > \beta} \sigma^2 \frac{\beta(1 + (s_\kappa^*)^\kappa)}{\beta + (\beta - \alpha)(s_\kappa^*)^\kappa} > \sigma^2 = \mathcal{R}_\kappa(0, \sigma).$$

Further, for  $N$  large enough

$$\min_{\alpha < \beta} \mathcal{R}_\kappa(\alpha, \sigma) \rightarrow \min_{\alpha < \beta} \frac{\beta}{\beta - \alpha} \sigma^2 \geq \sigma^2 = \mathcal{R}_\kappa(0, \sigma)$$

This proves (iii) in the case  $\kappa > 1$ .

## D Proof of Theorem 4

### D.1 Proof of Part (i)

Since  $p < n$  holds almost surely as  $N \rightarrow \infty$ , by excluding an additional zero probability event  $p \geq n$ , we can apply the same calculation in Section 2.2 and conclude that the following equation holds under our new settings, i.e.,

$$\mathbb{E}_{\mathbf{w}, \theta}[\text{Error}] \xrightarrow{P} \left( \text{tr}(\mathbf{\Sigma}_{P^c}) + \sigma^2 \right) \frac{\beta}{\beta - \alpha(\nu)}.$$

Hence, to show (22), we just need to characterize  $\text{tr}(\mathbf{\Sigma}_{P^c})$ . By Assumption B.1, we have

$$\text{tr}(\mathbf{\Sigma}_{P^c}) = \left( \sum_{i=1}^N \sigma_i^2 \mathbb{1}_{\{c_N \sigma_i^2 \leq \nu\}} \right) \rightarrow \frac{N}{c_N} \cdot \delta \int_{\eta_1}^\nu t f(t) dt.$$

Hence, we have

$$\mathbb{E}_{\mathbf{w}, \theta}[\text{Error}] \xrightarrow{P} \left( \frac{N}{c_N} \cdot \delta \int_{\eta_1}^\nu t f(t) dt + \sigma^2 \right) \frac{\beta}{\beta - \delta \int_\nu^\infty f(t) dt}.$$

577 Hence, (22) holds. Then our next step is to find the optimal  $\nu^*$  in  $(\nu_b, \infty)$  when  $\sigma = 0$ . Define

$$g_f(\nu) := \frac{\int_{\eta_1}^{\nu} t f(t) dt}{\beta - \delta \int_{\nu}^{\infty} f(t) dt}.$$

578 To minimize  $\mathbb{E}_{\mathbf{w}, \theta}[\text{Error}]$ , we just need to minimize  $g_f(\nu)$  over  $\nu \in (\nu_b, \infty) \cap \text{supp}(f)$ . To do this,  
579 we analyze the first derivative of  $g_f(\nu)$ . Note that

$$\begin{aligned} \frac{dg_f(\nu)}{d\nu} &= \frac{\nu f(\nu)}{\beta - \delta \int_{\nu}^{\infty} f(t) dt} - \frac{\delta f(\nu) \int_{\eta_1}^{\nu} t f(t) dt}{\left(\beta - \delta \int_{\nu}^{\infty} f(t) dt\right)^2} \\ &= \frac{f(\nu)}{\left(\beta - \delta \int_{\nu}^{\infty} f(t) dt\right)^2} \left( \nu\beta - \nu\delta \int_{\nu}^{\infty} f(t) dt - \delta \int_{\eta_1}^{\nu} t f(t) dt \right) \\ &= \frac{f(\nu)}{\left(\beta - \delta \int_{\nu}^{\infty} f(t) dt\right)^2} h_f(\nu), \quad \forall \nu \in (\nu_b, \infty) \cap \text{supp}(f). \end{aligned}$$

580 Therefore, the sign of  $\frac{dg_f(\nu)}{d\nu}$  is the same as the sign of  $h_f(\nu)$  on  $\nu \in (\nu_b, \infty) \cap \text{supp}(f)$ . Further,  
581 note that

$$\frac{dh_f(\nu)}{d\nu} = \beta - \delta \int_{\nu}^{\infty} f(t) dt > 0, \quad \forall \nu \in (\nu_b, \infty) \cap \text{supp}(f).$$

582 Hence  $h_f(\nu)$  is a strictly increasing function of  $\nu$  in  $(\nu_b, \infty) \cap \text{supp}(f)$ . Further, note that

$$\lim_{\nu \rightarrow \nu_b} h_f(\nu) = -\delta \int_{\eta_1}^{\nu_b} t f(t) dt < 0.$$

583 Hence, by continuity of  $h_f(\nu)$ , either equation  $h_f(\nu) = 0$  admits a unique solution denoted by  
584  $\nu^*$  on  $(\nu_b, \infty) \cap \text{supp}(f)$  or  $h_f(\nu) < 0$  holds for all  $\nu \in (\nu_b, \infty) \cap \text{supp}(f)$ . Hence, the minimum  
585 risk is achieved at  $\nu = \nu^*$  if  $\nu^*$  exists. Otherwise, it is achieved at any  $\nu \in \mathbb{R} \cup \{+\infty\}$  such that  
586  $\int_{\nu}^{\infty} f(s) ds = 0$ . Hence, if  $\nu^*$  exists, the value of the minimum risk given by

$$\mathbb{E}_{\mathbf{w}, \theta}[\text{Error}] \xrightarrow{P} \frac{N}{c_N} \cdot \frac{\beta}{\beta - \delta \int_{\nu^*}^{\infty} f(t) dt} \cdot \delta \int_{\eta_1}^{\nu^*} t f(t) ds = \frac{N}{c_N} \cdot \beta \nu^*,$$

587 where the last equation is due to the fact that  $h_f(\nu^*) = 0$ . Otherwise, the value of the minimum risk  
588 given by

$$\mathbb{E}_{\mathbf{w}, \theta}[\text{Error}] \xrightarrow{P} \frac{N}{c_N} \delta \int_{\eta_1}^{\infty} t f(t) dt.$$

## 589 D.2 Proof of Part (ii)

590 We apply the same strategy for the proof of Theorem 2. Since the proof is similar to the proof we  
591 have shown for Theorem 2 in Section 2.3 and Appendix B, we only address a few differences here.

592 From Section 2.3, we should first show that equation  $q_f(s, \nu) = 0$  admits a unique solution on  
593  $(0, \infty)$ . Note that

$$\frac{\partial q_f(s, \nu)/s}{\partial s} = \delta \int_{\nu}^{\infty} \frac{t f(t)}{(s+t)^2} dt > 0. \quad (76)$$

594 Hence,  $q_f(s, \nu)/s$  is a strictly increasing function of  $s$  on  $s \in (0, \infty)$ . Further, since  $\nu < \nu_b$ , we have

$$\begin{aligned} \lim_{s \rightarrow 0} \frac{q_f(s, \nu)}{s} &= \beta - \delta \int_{\nu}^{\infty} f(t) dt < 0, \\ \lim_{s \rightarrow \infty} \frac{q_f(s, \nu)}{s} &= \beta - 0 > 0. \end{aligned} \quad (77)$$

Hence, by continuity of function  $q_f(s, \nu)/s$ , we know  $q_f(s, \nu)/s = 0$  admits a unique solution denoted by  $s_f^*$  on  $(0, \infty)$ .

Note that with the same proof shown in Section 2.3, we have

$$\begin{aligned} \mathbb{E}_{w, \theta}[\text{Error}] = & \left( \underbrace{\text{tr} \left( \Sigma_P \left( I - P_{\mathbf{X}_P}^\perp \right) \right)}_{\text{part 1}} + \underbrace{\text{tr} \left( \mathbf{X}_{P^c}^\top (\mathbf{X}_P \mathbf{X}_P^\top)^{-1} \mathbf{X}_P \Sigma_P \mathbf{X}_P^\top (\mathbf{X}_P \mathbf{X}_P^\top)^{-1} \mathbf{X}_{P^c} \right)}_{\text{part 2}} + \text{tr} (\Sigma_{P^c}) \right) \\ & + \sigma^2 \left( \underbrace{\text{tr} \left( (\mathbf{X}_P \mathbf{X}_P^\top)^{-1} \mathbf{X}_P \Sigma_P \mathbf{X}_P^\top (\mathbf{X}_P \mathbf{X}_P^\top)^{-1} \right)}_{\text{part 3}} + 1 \right). \end{aligned}$$

To calculate part 1, we employ the proof strategy shown in Appendix B.2 with the following remarks. First, the expression for  $\alpha$  is now given by

$$\alpha(\nu) = \int_{\nu}^{\infty} f(t) dt.$$

Second, we should choose  $\mu_n = \min(\frac{1}{\sqrt{N}}, o(1/c_N))$  instead of  $\mu_n = \min(\frac{1}{\sqrt{N}}, o(N^{-\kappa}))$ . Third, to directly apply Lemma 1, we require  $\delta = 1$  from Assumption **B.1**. Yet, since we restrict  $\beta < \delta$  in Assumption **B.2**, it is straightforward to extend the results in Lemma 1 to handle the case where  $\delta \in (0, 1)$  by following the proof presented in Appendix B.4. The results of Lemma 2 is directly assumed by Assumption **B.1**. Finally to apply Lemma 3, we require  $\frac{n}{2}$  smallest eigenvalue of  $(c_N \Sigma_P)^{-1}$  is lower bounded by a positive constant. This can be easily verified due to Assumption **B.1** and the restriction on  $\beta < \delta$ . Hence, follow the proof in Appendix B.2 with these remarks, we can conclude that

$$\text{part 1} \xrightarrow{p} \frac{N}{c_N} \cdot \frac{\beta}{m_f(0)}, \quad (78)$$

where  $m_f(-\mu)$ , the Stieltjes transform of the limiting spectral distribution of the matrix  $\frac{1}{n} \tilde{\mathbf{X}} \tilde{\mathbf{X}}^\top$ , is given by

$$\mu = \frac{1}{m_f(-\mu)} - \frac{\alpha(\nu)}{\beta} \cdot \frac{\int_{\nu}^{\infty} \frac{tf(t)}{1+t \cdot m_f(-\mu)} dt}{\int_{\nu}^{\infty} f(t) dt},$$

which is equivalent to

$$\mu = \frac{1}{m_f(-\mu)} - \frac{\delta}{\beta} \cdot \int_{\nu}^{\infty} \frac{tf(t)}{1+t \cdot m_f(-\mu)} dt. \quad (79)$$

Therefore, we know  $m_f^* = m_f(0) > 0$  is the solution of the following equation

$$0 = \frac{\beta}{m_f^*} - \frac{\delta}{m_f^*} \int_{\nu}^{\infty} \frac{tf(t)}{1/m_f^* + t} dt = q_f \left( \frac{1}{m_f^*}, \nu \right). \quad (80)$$

Then  $s = \frac{1}{m_f^*}$  should be the solution of equation  $q_f(s, \nu) = 0$ . By uniqueness of  $s_f^*$ , we have  $s_f^* = \frac{1}{m_f^*}$ .

For part 2 and part 3, we employ the proof strategy shown in Appendix B.3 with a few remarks. First, note that due to Assumption **B.1**, we have

$$\text{tr} (c_N \Sigma_{P^c}) \rightarrow N \cdot \delta \int_{\eta_1}^{\nu} tf(t) dt \quad \text{and} \quad \text{tr} (c_N^2 \Sigma_{P^c}^2) \rightarrow N \cdot \delta \int_{\eta_1}^{\nu} t^2 f(t) dt.$$

Hence, we have the following analogue of (53):

$$\text{part 2} \xrightarrow{p} \frac{N}{c_N} \cdot \delta \int_{\eta_1}^{\nu} tf(t) dt \cdot (\psi + 1) + O_p \left( \frac{\sqrt{N}}{c_N} \cdot \psi \int_{\eta_1}^{\nu} t^2 f(t) dt \right),$$

617 where  $\psi = \text{tr} \left( \Sigma_P \mathbf{X}_P^\top (\mathbf{X}_P \mathbf{X}_P^\top)^{-2} \mathbf{X}_P \right)$ . Finally, to show (54), we should choose  $\mu_n =$   
 618  $\min(\frac{1}{\sqrt{N}}, o(1/c_N))$  instead of  $\mu_n = \min(\frac{1}{\sqrt{N}}, o(N^{-\kappa}))$ . Thus, with these remarks and modifi-  
 619 cations, we can show that

$$\text{part 2} \xrightarrow{P} \frac{N}{c_N} \cdot \delta \int_{\eta_1}^{\nu} t f(t) dt \cdot \frac{m'_f(0)}{m_f^2(0)},$$

620 and

$$\text{part 3} \xrightarrow{P} \frac{m'_f(0)}{m_f^2(0)}.$$

621 Hence, our last step is to characterize  $m'_f(0)$  using the chain rule. Note that from (79) and (80), we  
 622 have

$$-\beta z = q_f \left( \frac{1}{m_f(z)}, \nu \right)$$

623 Hence, taking the derivative with respect to  $z$  on both sides and with the chain rule, we have

$$-\beta = \frac{\partial q_f(s, \nu)}{\partial s} \Big|_{s=\frac{1}{m_f(z)}} \cdot \left( -\frac{m'_f(z)}{(m_f(z))^2} \right).$$

624 Hence, we have

$$\begin{aligned} \frac{m'_f(0)}{m_f^2(0)} &= \left( \frac{\partial q_f(s, \nu)}{\partial s} \Big|_{s=s_f^*} \right)^{-1} = \beta \left( \frac{q_f(s_f^*, \nu)}{s_f^*} + s_f^* \delta \int_{\nu}^{\infty} \frac{t f(t)}{(s_f^* + t)^2} dt \right)^{-1} \\ &= \beta \left( s_f^* \delta \int_{\nu}^{\infty} \frac{t f(t)}{(s_f^* + t)^2} dt \right)^{-1}, \end{aligned}$$

625 where last equation is due to the fact that  $q_f(s_f^*, \nu) = 0$  and  $s_f^* > 0$ . Hence, we have

$$\text{part 2} \xrightarrow{P} \frac{N}{c_N} \cdot \beta \frac{\int_{\eta_1}^{\nu} t f(t) dt}{s_f^* \int_{\nu}^{\infty} \frac{t f(t)}{(s_f^* + t)^2} dt},$$

626 and

$$\text{part 3} \xrightarrow{P} \beta \left( s_f^* \delta \int_{\nu}^{\infty} \frac{t f(t)}{(s_f^* + t)^2} dt \right)^{-1}.$$

627 This completes the proof of (ii) of the theorem.

### 628 D.3 Proof of Part (iii)

629 Suppose equation  $h_f(\nu) = 0$  has a solution on  $(\nu_b, \infty) \cap \text{supp}(f)$ . Then by comparing the two  
 630 formula in (25) and (23), we just need to show  $s_f^* = \frac{1}{m_f^*} < \nu^*$ . Then, from (76) and (77), we have

$$\forall s_0 \in (0, \infty), \text{ if } q_f(s_0) > 0, \text{ then } s_f^* < s_0.$$

631 Hence, it is sufficient to show that  $q_f(\nu^*) > h_f(\nu^*) = 0$ . Note that  $\forall \nu \geq \eta_1$

$$\begin{aligned} h_f(\nu) - q_f(\nu) &= \nu \delta \int_{\eta_1}^{\infty} \frac{t f(t)}{\nu + t} dt - \nu \delta \int_{\nu}^{\infty} f(t) dt - \delta \int_{\eta_1}^{\nu} t f(t) dt \\ &= \delta \nu \left( \int_{\nu}^{\infty} \frac{t f(t)}{\nu + t} dt - \int_{\nu}^{\infty} f(t) dt \right) + \delta \left( \int_{\eta_1}^{\nu} \frac{\nu}{\nu + t} t f(t) dt - \int_{\eta_1}^{\nu} t f(t) dt \right) < 0. \end{aligned}$$

632 Then since  $\nu^* > \nu_b > \eta_1$ , we have  $q_f(\nu^*) > h_f(\nu^*) = 0$ .

633 If equation  $h_f(\nu) = 0$  does not have a solution on  $(\nu_b, \infty) \cap \text{supp}(f)$ , then by comparing the two  
 634 formula in (25) and (24), we just need to show

$$\beta s_f^* = \frac{\beta}{m_f^*} < \delta \int_{\eta_1}^{\infty} t f(t) dt,$$

635 which is true because, due to  $q_f(s_f^*) = 0$ , we have

$$\beta s_f^* = s_f^* \delta \int_{\eta_1}^{\infty} \frac{tf(t)}{s_f^* + t} dt < \delta \int_{\eta_1}^{\infty} tf(t) dt.$$

636 Putting everything together completes the proof of part (iii).
